1  
2  
3  
4  
5  
6  
7  
8  
9  
10  
11  
12  
13  
14  
15  
16  
17  
18  
19  
20  
21  
22  
23  
24  
25

## **Connexin 43-mediated Neurovascular Interactions Regulate Neurogenesis in the Adult Brain Subventricular Zone**

Nafiisha Genet<sup>1,2,6</sup>, Gael Genet<sup>1</sup>, Jennifer S. Fang<sup>2,6</sup>, Nicholas W. Chavkin<sup>1</sup>,  
Hema H. Vasavada<sup>1,2,6</sup>, Joshua S. Goldberg<sup>2,6</sup>, Bipul R. Acharya, Neha Bhatt<sup>2,3</sup>, Kasey  
Baker<sup>2-6</sup>, Stephanie McDonnell<sup>1</sup>, Mahalia R. Huba<sup>1</sup>, Gerry Ma<sup>7</sup>, Anne Eichmann<sup>3,4</sup>,  
Jean Leon Thomas<sup>4-6</sup>, Charles ffrench-Constant<sup>7</sup> and Karen K. Hirschi<sup>1,2,6\*</sup>.

<sup>1</sup>Department of Cell Biology, University of Virginia School of Medicine, Charlottesville,  
VA 22908 USA.

<sup>2</sup>Departments of Medicine and Genetics, <sup>3</sup>Department of Cellular and Molecular  
Physiology, <sup>4</sup>Departments of Neuroscience and Cell Biology, <sup>5</sup>Department of  
Neurology, Yale University School of Medicine, New Haven, CT, 06511, USA.

<sup>6</sup>Yale Cardiovascular Research Center, Yale University School of Medicine, New Haven,  
CT, 06511, USA.

<sup>7</sup>MRC Centre for Regenerative Medicine, University of Edinburgh Centre for Translational  
Research, Scottish Centre for Regenerative Medicine, The University of  
Edinburgh, Edinburgh, UK.

**\*Corresponding author:** [kkh4yy@virgina.edu](mailto:kkh4yy@virgina.edu)

26 **Abstract** (150 words)

27         The subventricular zone (SVZ) is the largest neural stem cell (NSC) niche in the  
28 adult brain; herein, the blood-brain barrier is leaky, allowing direct interactions between  
29 NSCs and endothelial cells (ECs). Mechanisms by which direct NSC-EC interactions in  
30 the SVZ control NSC behavior are unclear. We found Cx43 to be highly expressed by  
31 both NSCs and ECs in the SVZ, and its deletion in either cell type leads to increased NSC  
32 proliferation and neuroblast generation, suggesting that Cx43-mediated NSC-EC  
33 interactions maintain NSC quiescence. This is further supported by in vitro studies  
34 showing co-culture with ECs decreases NSC proliferation and increases their expression  
35 of genes associated with quiescence in a Cx43-dependent manner. Cx43 mediates these  
36 effects in a channel-independent manner involving its cytoplasmic tail and ERK activation.  
37 Such insights further advance our understanding of NSC regulation in vivo and may  
38 inform NSC maintenance ex vivo for stem cell therapies for neurodegenerative disorders.

39

## 40 Introduction

41 In the adult mouse and human brains, neural stem cells (NSCs) reside in two  
42 germinal niches, the dentate gyrus of the hippocampus, or subgranular zone (SGZ), and  
43 the subventricular zone (SVZ) of the lateral ventricles, which is the largest NSC niche. In  
44 mice, both niches allow the replenishment of new neurons throughout life; the SGZ is  
45 involved in hippocampal neurogenesis while the SVZ enables olfactory bulb (OB)  
46 neurogenesis. The SVZ is a polarized niche, where neurogenesis is initiated when glial  
47 fibrillary acidic protein (GFAP<sup>+</sup>) quiescent NSCs are activated and become epidermal  
48 growth factor receptor (EGFR<sup>+</sup>) NSCs that give rise to mammalian achaete-shute  
49 homolog 1 (Mash-1<sup>+</sup>) transit-amplifying progenitor cells (TACs)<sup>1-4</sup>. On the ventricular side  
50 of the murine SVZ, quiescent NSCs protrude apical processes with short primary cilia that  
51 contact the ependymal cell layer lining the ventricles and cerebrospinal fluid within the  
52 ventricles<sup>1,5,6</sup>. On the parenchymal side, quiescent NSCs project long basal end-feet that  
53 make direct contact with blood vessels in the niche<sup>7</sup>.

54 In the SVZ, TACs assemble into small clusters and differentiate into chains of  
55 doublecortin (DCX<sup>+</sup>) neuroblasts<sup>8</sup>; TACs are fast-dividing while neuroblasts proliferate ten  
56 times slower<sup>2,6,9,10</sup>. The chains of neuroblasts, along with some clusters of TACs, migrate  
57 tangentially from the SVZ through a restricted pathway called the rostral migratory stream  
58 (RMS) toward their destination in the OB<sup>2,11</sup>. Once in the OB, neuroblasts exit the RMS  
59 and migrate radially into the granular and periglomerular layers to differentiate into  
60 interneurons<sup>9,12-14</sup>. In the adult SVZ, NSCs predominantly undergo symmetric,  
61 differentiative and consuming divisions to generate TACs, which gradually depletes the  
62 pool of quiescent NSCs over time<sup>15,16</sup>. Therefore, it is important to understand the  
63 signaling cues between NSCs and the other SVZ niche cells, especially vascular  
64 endothelial cells (ECs), to tightly regulate NSC activation, differentiation, migration, and  
65 neurogenesis.

66 It is well-established that SVZ microvascular ECs are fundamental to the niche and  
67 support NSC self-renewal, maintenance, proliferation, differentiation, and migration of  
68 neural progenitor cells<sup>17,18</sup>. Several studies have highlighted the role of paracrine  
69 signaling between vascular ECs and NSCs in the SVZ via EC-secreted factors such as,

70 vascular endothelial growth factor (VEGF)-A and -C<sup>19,20</sup>, betacelluline<sup>21</sup>, pigment  
71 epithelium-derived factor (PEDF)<sup>22</sup> and placental growth factor (PIGF) type 2<sup>23</sup> that  
72 regulate NSC behavior in the SVZ. Moreover, in the SVZ microvasculature, and unlike  
73 other areas of the brain, the ECs that form the blood vessels lack pericyte and astrocyte  
74 coverage, enabling direct contact between NSCs and ECs in this niche<sup>18,24,25</sup>. This allows  
75 for physical interactions between NSCs and ECs to enable juxtacrine signaling via  
76 membrane-bound proteins and their associated ligands to enable Notch and Ephrin  
77 signaling<sup>25,26</sup>. Intercellular junctions, such as gap junctions, also form between NSCs and  
78 ECs<sup>27</sup>. Gap junctions enable intercellular signaling via the transfer of ions, metabolites,  
79 soluble factors and molecules of  $\leq 1$ KDa. In the developing mouse brain, gap junction  
80 proteins connexin 43 (Cx43) and Cx26 are differentially expressed and play important  
81 roles in the regulation of neurogenesis<sup>28,29</sup>. Gap junctions comprised of Cx43 are known  
82 to form between NSCs and ECs in the mouse SVZ and RMS at various postnatal stages<sup>27</sup>.  
83 However, the role of EC- or NSC- expressed Cx43 in the regulation of adult SVZ  
84 neurogenesis is not known and the focus of this study.

85         Herein, using an in-vitro transwell co-culture system, we showed that Cx43-  
86 mediated interactions between NSCs and ECs decrease NSC proliferation and increase  
87 their survival. Furthermore, in adult mice in which *Gja1*, which encodes for Cx43 protein,  
88 has been conditionally deleted in either NSCs or ECs for 1 week, there is an initial  
89 increase in NSC activation and the generation of DCX<sup>+</sup> neuroblasts. However, after 4  
90 weeks deletion, there is a significant reduction of quiescent NSCs in the SVZ and  
91 increased neurogenesis in the OB. Finally, we show that deletion of *Gja1* in ECs impairs  
92 the repopulation of the SVZ niche upon infusion of the antimetabolic drug cytosine- $\beta$ -  
93 arabinofuranoside (Ara-C). Collectively, these studies suggest that Cx43-mediated  
94 interactions between NSCs and ECs maintain NSC quiescence to regulate neurogenesis  
95 in the adult SVZ. Such insights can be applied to the development of ex vivo biomimetic  
96 engineered SVZ niches to further study NSC regulation and to potentially use them to  
97 treat neurovascular disorders such as stroke.

## 98 **Results**

### 99 ***NSC-EC co-culture decreases NSC proliferation in a Cx43-dependent manner.***

100 To investigate the effects of ECs on NSC behavior, we used a 2D transwell system  
101 where ECs were co-cultured in contact with NSCs allowing for direct cell-to-cell  
102 interactions (**Figure 1a and 1b**). In this co-culture model, NSCs were seeded in the  
103 absence of EGF and FGF (the growth factors that support NSC survival and growth) to  
104 specifically assess the role of ECs in the regulation of NSC behavior. We observed that  
105 ECs promote NSC survival, while NSC proliferation measured via EdU incorporation is  
106 significantly decreased (**Figure 1c and 1d**). Bulk mRNA sequencing (RNAseq) of NSCs  
107 in co-culture with ECs revealed that genes associated with NSC quiescence, such as  
108 *Gfap*, *Sox9* and *Prom1*, are upregulated, while genes associated with NSC activation,  
109 such as *Egfr* and *Ccne1*, are downregulated in comparison with NSCs cultured alone  
110 (**Figure 1e**). Gene Ontology (GO) analysis revealed that genes associated with  
111 neurogenesis are downregulated in NSCs when co-cultured with ECs (**Figure 1f**).  
112 Additionally, quantitative (q) PCR analysis performed on NSCs co-cultured with ECs  
113 showed increased mRNA levels of *Gfap*, *Nestin* and *Glast*, genes associated with NSC  
114 quiescence while expression of *Egfr*, *Mash1*, and *Cyclin E*, genes associated with NSC  
115 activation, are decreased (**Figure 1g**).

116 The RNAseq analysis also revealed the upregulation of potential regulators of  
117 NSC-EC interactions (**Figure 1e**), including *Gja1* (also referred to as *Cx43*), which  
118 encodes the gap junction protein Cx43. This was of interest to us, as we previously found  
119 Cx43 mediates interactions between ECs and vascular mural cells<sup>30</sup>. Thus, we used  
120 qPCR analysis to confirm that *Cx43* expression is increased in NSCs when co-cultured  
121 with ECs (**Figure 1h**). To determine whether Cx43 plays a role in mediating NSC-EC  
122 interactions that lead to changes in NSC gene expression, we used siRNA to suppress  
123 *Cx43* expression in ECs and then co-cultured them with NSCs. This resulted in  
124 significantly decreased *Gfap* and *Glast* mRNA levels, and significantly upregulated *Egfr*,  
125 *Mash1* and *Cyclin E* mRNA levels (**Figure 1i**). Conversely, when we silenced *Cx43* in  
126 NSCs and then co-cultured them with ECs, we did not observe changes in NSC gene

127 expression (**Extended Figure 1a-e**). Collectively, these results suggest that ECs may  
128 enhance NSC survival and quiescence via Cx43.

129

### 130 ***ECs and NSCs in the adult brain SVZ highly express Cx43.***

131 In our RNAseq studies, we found that *Gja1/Cx43* was the only gap junction gene  
132 significantly upregulated in NSCs when co-cultured with ECs (**Figure 1e**); however, both  
133 cell types have been shown to express other Cx proteins<sup>31,32</sup>. Thus, we measured the  
134 expression of different Cx proteins in ECs and NSCs in vivo in the adult mouse brain SVZ.  
135 Using immunohistochemistry and antibodies against different Cx proteins and CD31,  
136 which is expressed by all ECs, we found a low percentage of ECs expressing Cx26 and  
137 Cx31, while a high percentage of ECs express Cx43 (**Figure 2a**). To evaluate the  
138 expression of Cx proteins in NSCs in the murine SVZ, we first labeled the NSCs using a  
139 BrdU-labeling protocol in which label-retaining cells (LRC) represent quiescent NSCs<sup>33</sup>.  
140 We found that a percentage of SVZ LRC-NSCs express multiple Cx proteins, and a higher  
141 percentage of LRC-NSCs express Cx43 (**Figure 2b**), similar to ECs. To determine  
142 whether Cx43 is present between NSCs and ECs in the SVZ in vivo, we performed  
143 immunohistochemistry and high-resolution confocal imaging of SVZ coronal sections. We  
144 found punctate-like Cx43 expression between CD31<sup>+</sup> ECs and GFAP<sup>+</sup>SOX2<sup>+</sup> NSCs, as  
145 well as between SOX2<sup>+</sup> cells of the ependymal layer. (**Figure 2c**).

146 To determine whether NSC- and/or EC-expressed Cx43 plays a role in the  
147 regulation of NSCs in the adult brain SVZ, we used *Gja1<sup>flox/flox</sup>* mice (hereafter referred to  
148 as *Cx43<sup>fl/fl</sup>* mice) and an inducible loss-of-function genetic approach. To selectively delete  
149 *Cx43* in ECs, we crossed *Cx43<sup>fl/fl</sup>* with *Cdh5Cre<sup>iERT2</sup>* to generate *Cx43EC<sup>iKO</sup>* mice, and to  
150 selectively delete *Cx43* in NSCs, we crossed *Cx43<sup>fl/fl</sup>* mice with *GlastCre<sup>iERT2</sup>* to generate  
151 *Cx43Glast<sup>iKO</sup>* mice. To validate Cre-mediated recombination in ECs and NSCs in these  
152 models, we crossed both *Cx43EC<sup>iKO</sup>* and *Cx43Glast<sup>iKO</sup>* mice with *ROSA<sup>mT/mG</sup>* mice in  
153 which, upon tamoxifen (Tx) injection, cell-membrane localized tdTomato converts to GFP  
154 in Cre recombinase-expressing cells. We performed recombination and genetic deletion  
155 in 6-week-old (adult) mice with Tx injection, as shown in the timeline in **Figure 2d**. As

156 expected, we observed GFP<sup>+</sup> ECs in the SVZ of *Cx43EC<sup>iKO</sup>;ROSA<sup>mT/mG</sup>* mice and GFP<sup>+</sup>  
157 NSCs in the SVZ of *Cx43Glast<sup>iKO</sup>;ROSA<sup>mT/mG</sup>* (**Figure 2e**).

158 To further confirm the loss of Cx43 expression in our mouse models, we also  
159 performed immunostaining with antibodies against CD31 to label ECs and antibodies  
160 against SOX2 and GFAP to co-label NSCs. In the SVZ of *Cx43EC<sup>iKO</sup>* mice, we found loss  
161 of Cx43 expression in the CD31<sup>+</sup> ECs and maintenance of Cx43 expression in ependymal  
162 cells and NSCs. In the SVZ of *Cx43Glast<sup>iKO</sup>* mice, we found Cx43 expression was lost in  
163 GFAP<sup>+</sup>SOX2<sup>+</sup> NSCs while ECs and ependymal cells retained expression (**Figure 2f**).  
164 *Cx43* deletion efficiency in ECs of *Cx43EC<sup>iKO</sup>* and NSCs of *Cx43Glast<sup>iKO</sup>* was confirmed  
165 via qPCR analysis of primary SVZ cells dissociated and FACS-isolated into the EC  
166 (CD31<sup>+</sup>CD45<sup>-</sup>Glast<sup>-</sup>) and NSC (Glast<sup>+</sup>CD45<sup>-</sup>CD31<sup>-</sup>) fractions (**Extended Figure 2**). Our  
167 studies showed that in *Cx43EC<sup>iKO</sup>* mice, ECs lost ~90% of *Cx43* expression, which was  
168 maintained in NSCs. Conversely, in *Cx43Glast<sup>iKO</sup>* mice, *Cx43* expression was suppressed  
169 by ~75% in NSCs and maintained in ECs (**Figure 2g**). These results demonstrate  
170 effective deletion of Cx43 in SVZ ECs and NSCs in Tx-induced *Cx43EC<sup>iKO</sup>* and  
171 *Cx43Glast<sup>iKO</sup>* mice, respectively.

172

### 173 ***Cx43 deletion in ECs or NSCs depletes quiescent NSCs in the adult SVZ.***

174 We next analyzed the consequences of short- (1-week post-Tx) and long-term (4  
175 weeks post-Tx) deletion of *Cx43* in *Cx43EC<sup>iKO</sup>* and *Cx43Glast<sup>iKO</sup>* mice, compared to  
176 control *Cx43<sup>fl/fl</sup>*, on the number of quiescent and activated NSCs and neuroblasts in the  
177 adult SVZ (**Figure 3a and 3b**). The identification of quiescent NSCs is still a challenge  
178 due to lack of specific markers. In our study, we used combined expression of the  
179 astrocytic marker GFAP and the neural stem and progenitor cell marker SOX2 to identify  
180 NSCs<sup>25,34,35</sup>. Since SOX2 and GFAP are expressed by both quiescent and activated  
181 NSCs<sup>18</sup>, we injected *Cx43EC<sup>iKO</sup>* and *Cx43Glast<sup>iKO</sup>* mice, at 1 week and 4 weeks post-Tx,  
182 with EdU 24 hr prior to sacrifice to measure quiescent NSCs (EdU<sup>-</sup>) and activated NSCs  
183 (EdU<sup>+</sup>).

184 At 1-week post-*Cx43* deletion, we observed a decrease in the number of  
185 GFAP<sup>+</sup>SOX2<sup>+</sup>EdU<sup>-</sup> quiescent NSCs in both *Cx43EC<sup>iKO</sup>* and *Cx43Glast<sup>iKO</sup>* SVZ (**Figure 3c**

186 **and 3i)** and further reduction at 4 weeks post-Tx (**Figure 3f and 3i**). Additionally, the  
187 absence of GFAP<sup>+</sup> cells co-expressing S100 $\beta$  in the striatum of the mutant SVZs shows  
188 that the decrease in quiescent NSCs observed at 4 weeks post-*Cx43* deletion is not due  
189 to abnormal astrogliosis (**Extended Figure 3a**). We also observed significantly increased  
190 EGFR<sup>+</sup>SOX2<sup>+</sup>EdU<sup>+</sup> activated NSCs in both mutant SVZs at 1-week post-Tx (**Figure 3d**  
191 **and 3j**); however, at 4 weeks post-Tx, the number of activated NSCs was significantly  
192 decreased (**Figure 3g and 3j**). Neuroblasts, identified via expression of DCX, were  
193 significantly increased in both *Cx43*EC<sup>iKO</sup> and *Cx43*Glast<sup>iKO</sup> SVZ at 1-week post-*Cx43*  
194 deletion (**Figure 3e and 3k**), while their number was significantly reduced in both mutants  
195 at 4 weeks post-Tx (**Figure 3h and 3k**). Furthermore, we used *Cx43*Glast<sup>iKO</sup>;ROSA<sup>mT/mG</sup>  
196 mice to perform lineage-tracing at 1 week post-*Cx43* deletion. We found DCX<sup>+</sup>  
197 neuroblasts (**Extended Figure 3b**, white arrow heads) localized within the recombinant  
198 GFP<sup>+</sup> population, supporting that the neuroblasts generated in the *Cx43*Glast<sup>iKO</sup> SVZ  
199 (**Figure 3e and 3k**) were derived from *Cx43*-deficient NSCs.

200 Elsewhere in the brain, with exception of the SVZ, vascular ECs interact with  
201 astrocytes and pericytes via *Cx43*, which promotes their blood-brain-barrier (BBB)  
202 function<sup>36-38</sup>. Thus, we sought to determine whether deletion of *Cx43* in vascular ECs or  
203 Glast-expressing astroglial cells compromised BBB integrity and caused vascular  
204 leakage. To assess vascular permeability, we injected *Cx43*<sup>fl/fl</sup>, *Cx43*EC<sup>iKO</sup> and  
205 *Cx43*Glast<sup>iKO</sup> mice with 2% Evans blue 24 hr prior to sacrifice, as depicted in **Extended**  
206 **Figure 4a**, and evaluated vascular leakage in brain and liver tissues. As expected, we  
207 did not observe vascular leakage in the control brains; there was also no leakage in the  
208 mutant brains (**Extended Figure 4b**). In contrast, in liver tissues that lack barrier function,  
209 leakage of Evans blue dye from the vasculature was evident throughout control and  
210 mutant tissues (**Extended Figure 4c**). In addition, using Vascupaint green perfusion, we  
211 did not observe any differences in *Cx43*EC<sup>iKO</sup> and *Cx43*Glast<sup>iKO</sup> brain microvasculature  
212 morphology at 4 weeks post-Tx, compared to *Cx43*<sup>fl/fl</sup> controls. Thus, deletion of *Cx43* in  
213 vascular ECs or astroglial cells does not appear to compromise BBB integrity in the brain.  
214 We also measured brain and OB areas and found no differences between *Cx43*<sup>fl/fl</sup> control



215 mice and *Cx43EC<sup>iKO</sup>* and *Cx43Glast<sup>iKO</sup>* mice after short- or long-term deletion of *Cx43*  
216 **(Extended Figure 5).**

217

218 ***Cx43* deletion in ECs or NSCs increases neuroblast generation in the RMS and**  
219 ***neurogenesis in the OB.***

220 Since neuroblasts generated in the SVZ migrate toward the OB via the RMS, we  
221 next assessed whether increased neuroblast generation in the *Cx43EC<sup>iKO</sup>* and  
222 *Cx43Glast<sup>iKO</sup>* SVZs at 1-week post-Tx leads to increased neuroblasts in the RMS (**Figure**  
223 **4a**). On brain sagittal sections immunostained with anti-DCX, we analyzed the anterior  
224 portion of the RMS recognized by its elbow-shaped morphology (**Figure 4b and 4c**). In  
225 this region, we found significantly increased DCX<sup>+</sup> neuroblasts in *Cx43EC<sup>iKO</sup>* and  
226 *Cx43Glast<sup>iKO</sup>* mice, compared to *Cx43<sup>fl/fl</sup>* controls (**Figure 4d and 4e**). We next examined  
227 whether the observed increase in neuroblasts in *Cx43EC<sup>iKO</sup>* and *Cx43Glast<sup>iKO</sup>* RMS at 1-  
228 week post-Tx affects neurogenesis in the OB. To do so, we used a LRC protocol (**Figure**  
229 **4f**), in which 6-week-old adult mice received 3 consecutive EdU injections on the first 3  
230 days of a 5-day Tx-induction. At 4 weeks post-Tx, mice were analyzed via immunostaining  
231 with anti-EdU and anti-NeuN, to label newborn neurons<sup>2,39</sup>. Interestingly, we observed a  
232 significantly increased number of LRC/NeuN<sup>+</sup> interneurons in the granule cell layer (GCL)  
233 of both *Cx43EC<sup>iKO</sup>* and *Cx43Glast<sup>iKO</sup>* OB compared to *Cx43<sup>fl/fl</sup>* controls (**Figure 4g-4i**).

234 To determine whether neurons in the *Cx43Glast<sup>iKO</sup>* RMS were derived from SVZ  
235 NSCs, we used *Cx43Glast<sup>iKO</sup>;ROSA<sup>mT/mG</sup>* mice to perform lineage-tracing studies  
236 (**Extended Figure 6a**). We found LRC/NeuN<sup>+</sup> cells (**Extended Figure 6b**, white arrows)  
237 localized within the recombinant GFP<sup>+</sup> population, supporting that the newborn olfactory  
238 neurons generated in the *Cx43Glast<sup>iKO</sup>* SVZ (**Figure 3e and 3k**) were derived from *Cx43*-  
239 deficient NSCs. Importantly, the increase in newborn neurons in *Cx43EC<sup>iKO</sup>* and  
240 *Cx43Glast<sup>iKO</sup>* OB was not a consequence of neuronal death, as we did not observe  
241 changes in apoptosis levels in *Cx43EC<sup>iKO</sup>* and *Cx43Glast<sup>iKO</sup>* OB measured via immuno-  
242 staining for cleaved CASPASE-3 (**Extended Figure 6c-e**). Collectively, these results  
243 suggest that the short-term deletion of *Cx43* in ECs or NSCs leads to decreased  
244 quiescent NSCs and increased activated NSCs in the SVZ, as well as increased

245 neuroblast generation in the SVZ and RMS. After long-term deletion of EC- or NSC-  
246 expressed *Cx43*, the quiescent NSC pool in the SVZ is further depleted, while activated  
247 NSCs and neuroblasts are exhausted from the SVZ, and neurogenesis is increased in  
248 the OB. Thus, both EC- and NSC-expressed *Cx43* contributes to the regulation of adult  
249 SVZ neurogenesis.

250

### 251 ***EC-expressed Cx43 is necessary for SVZ niche repopulation.***

252 Our studies suggested that NSC quiescence and maintenance in the SVZ niche is  
253 regulated by ECs in a *Cx43*-dependent manner. Thus, we tested whether lack of EC-  
254 expressed *Cx43* would impair NSC-mediated SVZ niche repopulation after depletion of  
255 all SVZ proliferating cells (activated NSCs, TACs and neuroblasts) via anti-mitotic drug  
256 Ara-C (cytosine- $\beta$ -D-arabinoside). At 1-week post-Tx injections in *Cx43*<sup>EC<sup>iKO</sup> and *Cx43*<sup>fl/fl</sup>  
257 control mice, Ara-C (2%) or saline (control) was infused directly in one of the two lateral  
258 ventricles (ipsilateral) via a cannula connected to a subcutaneously implanted mini-  
259 osmotic pump for 6 consecutive days (**Figure 5a**). EdU was administered to label actively  
260 proliferating cells 24 hr prior to sacrifice. The intracerebroventricular injection coordinates  
261 were verified via injection of 1% Fast Green dye, as previously described<sup>40</sup> (**Extended**  
262 **Figure 7a**).</sup>

263 We first confirmed that Ara-C treatment depleted all EdU<sup>+</sup> proliferating cells  
264 (**Figure 5b and 5c**), as well as DCX<sup>+</sup> neuroblasts (**Figure 5d and 5e**), in the SVZ.  
265 Importantly, we observed increased DCX<sup>+</sup> neuroblasts in control, saline-infused  
266 *Cx43*<sup>EC<sup>iKO</sup> SVZ compared to *Cx43*<sup>fl/fl</sup> (**Figure 5d and 5e**). These results are consistent  
267 with our previous studies (**Figure 3e and 3k**) where we demonstrated that short-term  
268 deletion of *Cx43* in *Cx43*<sup>EC<sup>iKO</sup> leads to increased SVZ neuroblasts. Subsequently, we  
269 analyzed the number of DCX<sup>+</sup> neuroblasts in the SVZ 6 days after Ara-C withdrawal  
270 (**Figure 5f**, chase period). DCX<sup>+</sup> neuroblasts were significantly reduced in *Cx43*<sup>EC<sup>iKO</sup>  
271 SVZ, compared to *Cx43*<sup>fl/fl</sup> (**Figure 5g and 5h**). Thus, absence of *Cx43* in ECs impairs  
272 the re-population of the SVZ niche post-Ara-C treatment, supporting that *Cx43* expression  
273 in ECs contributes to the maintenance of the quiescent NSCs pool in the SVZ and  
274 prevents their premature activation and depletion.</sup></sup></sup>

275 ***Cx43 cytoplasmic tail mediates EC-induced NSC quiescence in an ERK-dependent***  
276 ***manner.***

277 We next investigated the mechanism(s) by which Cx43 regulates NSC-EC  
278 interactions to maintain NSC quiescence. Cx43 can function in a channel-dependent or  
279 channel-independent manner; thus, we created lentiviral constructs to express Cx43  
280 mutant proteins to perform structure-function studies to determine how Cx43 mediates  
281 NSC-EC interactions. To investigate channel-dependent functions, we generated a Cx43  
282 channel-dead mutant (*Cx43T154A*) that allows gap junction channel formation but blocks  
283 Cx43 channel activity<sup>41</sup>. To investigate channel-independent functions, we generated  
284 mutant Cx43 that lacks its cytoplasmic tail (*Cx43CTΔ258*)<sup>42</sup>, which can mediate  
285 intracellular signaling, independent of channel formation<sup>43</sup>. ECs and NSCs were treated  
286 with si*Cx43* to suppress endogenous Cx43 expression, and then transduced with lentiviral  
287 constructs to express the mutant Cx43 proteins. Expression of the Cx43 cytoplasmic tail  
288 truncated mutant (*Cx43CTΔ258*, 1 μg), lead to a significant downregulation of genes  
289 associated with NSC quiescence (*Gfap*, *Nestin* and *Glast*), while expression of the Cx43  
290 dead-channel mutant (*Cx43T154A*, 0.5 μg) had no effect on NSC gene expression  
291 (**Figure 6a, Extended Figure 8a and 8b**). Additionally, when we treated both NSC and  
292 EC with <sup>43</sup>gap 26 peptide (100 nM), which blocks Cx43 channel activity, we did not  
293 observe any changes in NSC gene expression associated with either quiescence or  
294 activation (**Figure 6b**). Thus, it appears that EC-mediated NSC quiescence is regulated  
295 by Cx43 in a channel-independent manner. We assessed whether overexpression of  
296 *Cx43* in NSCs alone was sufficient to suppress NSC proliferation, as measured via EdU  
297 incorporation, and found that Cx43 overexpression in NSC does not affect their  
298 proliferation (**Extended Figure 8c-g**).

299 It is known that the Cx43 cytoplasmic tail is involved in the activation of  
300 downstream effectors involved in ERK signaling<sup>43,44</sup> and, interestingly, we observed  
301 increased ERK activation in NSCs when co-cultured with ECs and the latter is abrogated  
302 in NSCs co-cultured with ECs silenced for *Cx43* (**Figure 6c and 6d**). Finally, inhibition of  
303 ERK signaling with U0126 (10 μM) in NSCs co-cultured with ECs abolished the effect of  
304 ECs on NSC expression of genes associated with quiescence (**Figure 6e**). Collectively,

305 these results suggest that EC maintenance of NSC quiescence is mediated by the Cx43  
306 cytoplasmic tail, via ERK activation in NSCs.

## 307 **Discussion**

308 NSCs in the adult brain SVZ reside in a vascularized niche, which is known to  
309 regulate their proliferation, migration, and differentiation via niche cell-derived secreted  
310 factors<sup>21,22,45-49</sup>. It is also well established that quiescent NSC basal end-feet are in direct  
311 contact with vascular ECs allowing neuro-vascular interactions<sup>7</sup>. Past studies showed that  
312 the expression of Cx43 in neural progenitor cells maintains their survival and proliferative  
313 state<sup>27,50-53</sup>. However, the role of Cx43-mediated neuro-vascular interactions in the adult  
314 SVZ in the regulation of NSC behavior has not been investigated.

315 In this study, we first used an in vitro EC-NSC co-culture system that allows direct  
316 cell-to-cell contact<sup>54,55</sup> to demonstrate that ECs decrease NSC proliferation and increase  
317 their expression of genes associated with quiescence in a Cx43-dependent manner. We  
318 then used transgenic mice to show that deletion of Cx43 in ECs or NSCs in vivo leads to  
319 increased NSC proliferation and neuroblast generation in the SVZ, as well as increased  
320 neurogenesis in the OB. Our observations are consistent with previously published  
321 studies showing that the vascular niche maintains quiescent NSCs and promotes their  
322 survival<sup>25,56</sup>, and provide insight into the underlying mechanisms of regulation.

323 Interestingly, our in vivo results show the same outcome whether Cx43 is deleted  
324 in ECs or NSCs while, in vitro, only EC-expressed Cx43 mediates effects on NSC  
325 proliferation and survival. There are many differences between the two systems that can  
326 account for this finding, including lack of other SVZ components in NSC-EC co-cultures  
327 that may be important for this regulation. In addition, in the in vitro studies, NSCs were  
328 silenced for *Cx43* prior to co-culture with ECs while in vivo NSCs and ECs were in contact  
329 prior to *Cx43* deletion in either ECs or NSCs. Thus, there are likely more complex  
330 interactions between ECs and NSCs, and perhaps other cell types, in the SVZ niche that  
331 depend on EC- and NSC-expressed Cx43.

332 The evaluation of the short- vs. long-term deletion of *Cx43* in either ECs or NSCs  
333 showed that the SVZ quiescent NSC pool is gradually depleted over time and leads to  
334 increased neuroblasts in the RMS and ultimately increased newborn neurons in the OB.  
335 Consistent with this, when quiescent NSCs in the *Cx43*EC<sup>iKO</sup> SVZ were triggered towards  
336 activation to replenish the depleted niche post-AraC infusion, the number of neuroblasts

337 generated in *Cx43EC<sup>iKO</sup>* was significantly less than controls. This finding is consistent  
338 with the idea that deletion of *Cx43* in ECs activates quiescent NSCs in the adult SVZ  
339 which leads to a gradual exhaustion of the NSC pool over time; thus, the NSCs in the  
340 *Cx43EC<sup>iKO</sup>* SVZ cannot replenish the niche to the same extent as control littermates.  
341 Whether the increased newborn neurons in the OB leads to functional neurons that fully  
342 integrate the olfactory neuronal circuits and modify the olfaction behavior of these *Cx43*-  
343 deficient animals is not yet known.

344 Using mutant *Cx43* proteins, we demonstrated that *Cx43* mediates EC regulation  
345 of NSCs in a channel-independent manner that involves its cytoplasmic tail and ERK  
346 activation. However, further mechanistic studies are needed to determine how *Cx43* is  
347 regulating ERK activation in NSCs co-cultured with ECs. For example, whether the  
348 phosphorylation of *Cx43* on a particular serine residue of the cytoplasmic tail is  
349 responsible for ERK activation remains to be addressed; however, the phosphorylation  
350 serine sites 255, 279 and/or 282 of the *Cx43* cytoplasmic region were previously linked  
351 with ERK activity<sup>57</sup>. Also, it has been shown that activated ERK can bind to *Cx43*,  
352 suggesting that *Cx43* may play a direct role in ERK regulation<sup>58</sup>. We found that EC-NSC  
353 co-culture increases *Cx43* expression in NSCs; however, over-expression of *Cx43* in  
354 NSCs does not mimic the effects of EC-expressed *Cx43* on NSC behavior or gene  
355 expression. Thus, although it is possible that, in NSCs, ERK signaling via the *Cx43*  
356 cytoplasmic tail enables the activation of downstream effectors that promote NSC  
357 quiescence, the regulatory mechanisms are likely to be more complex.

358 In summary, we used both in vitro and in vivo approaches to gain insight into the  
359 role of *Cx43* in the regulation of NSCs in the adult SVZ. We show that EC- and NSC-  
360 expressed *Cx43* are required to maintain NSC quiescence. Further mechanistic studies  
361 are needed to determine exactly how *Cx43* is regulating NSC behavior in the adult SVZ,  
362 and our in vitro studies suggest that this occurs in a channel-independent manner. Such  
363 insights can be applied to the bioengineering of a NSC niche ex vivo that better mimics  
364 its in vivo environment, to enable sustained NSC viability and functional properties for  
365 stem cell therapies for neurological disorders.

366 **Acknowledgements.** The authors of this work were supported by: NIH grants to  
367 K.K.H. (R01 EB 016629 and HL146056, and NIH U2EB017103), AHA post-doctoral  
368 fellowship to N.G. (19POST34400065), NIH grants to C.N. (T32 HL007224, T32  
369 HL007284).

370

371 **Author contributions.** N.G, G.G., J.S.F., N.C.W., H.H.V., J.S.G., B.R.A., N.B., K.B.,  
372 G.M., performed experiments. S.M. and M.R.H. maintained mouse lines and performed  
373 mouse genotyping. B.R.A generated Cx43 lentiviral constructs. N.G., G.G. and K.K.H  
374 designed experiments, analyzed data and wrote the manuscript. A.E., J.L.T., C.F.C  
375 contributed to experimental design and manuscript editing.

376

## 377 **Material and Methods**

378 **Animals.** *Cdh5Cre*<sup>ERT2</sup>1Rha (also referred to as *VE-CadherinCre*<sup>ERT2</sup>)<sup>59,60</sup> and  
379 *GLASTCre*<sup>ERT2</sup> (*Slc1a3Cre*<sup>ERT2</sup>)<sup>61</sup> were gifts from Drs. Ralf Adams and Jean Léon  
380 Thomas labs, respectively. *Gja1*<sup>flox/flox</sup> (also referred to as *Cx43*<sup>flox/flox</sup>) and *ROSA*<sup>mT/mG</sup>  
381 mice were commercially purchased. For genetic loss-of-function studies, *Cdh5Cre*<sup>ERT2</sup>  
382 and *GLASTCre*<sup>ERT2</sup> animals were crossed to mice carrying a loxP-flanked *Gja1* gene  
383 (*Cx43*<sup>flox/flox</sup>) to create *Cx43EC*<sup>iKO</sup> and *Cx43Glast*<sup>iKO</sup>, respectively. Mice were maintained  
384 under standard pathogen-free conditions. All animal protocols and procedures were  
385 reviewed and approved by the University of Virginia Animal Care and Use Committee  
386 (protocol #4277) and complied with all ethical regulations. To induce Cre activity in  
387 *Cx43EC*<sup>iKO</sup> and *Cx43Glast*<sup>iKO</sup>, 6-week-old adult mice received intraperitoneal (i.p.)  
388 injections of Tamoxifen (Tx, 2mg/day) for 5 consecutive days, which resulted in ~90%  
389 and ~75% *Gja1* deletion in ECs of *Cx43EC*<sup>iKO</sup> and NSCs of *Cx43Glast*<sup>iKO</sup> respectively, as  
390 assessed by qPCR (Figure 3E). Tx-injected *Cx43*<sup>flox/flox</sup> littermates were used as controls.  
391 Mice of both sexes were used to minimize gender-related biased results and analyzed at  
392 1 week-post final Tx injections for short-term deletion studies and 4 week-post final Tx  
393 injections for long-term deletion studies. For Ara-C studies, mice were analyzed at 2- and  
394 3-week-post final Tx injection. To label actively proliferating progenitors in the SVZ, mice  
395 received an i.p. injection of EdU (50mg/kg) 24 hr prior to sacrifice. We used label retention  
396 to identify quiescent NSCs that are slow-cycling cells, also known as label retaining cells  
397 (LRC) that retain BrdU or EdU for extended periods due to their relatively long cycling  
398 times<sup>18,62,63</sup>. To do so, mice received 5 consecutive injections of BrdU or 3 consecutive  
399 EdU injections on the first 3 days of the 5 days of Tx injections, mice were analyzed 4-  
400 weeks post-Tx.

401

402 **Mouse genotyping.** Ear sample DNA was lysed using the hotshot method.  
403 Samples were lysed in alkaline lysis reagent (pH 12) containing 25mM NaOH and 0.2mM  
404 EDTA for 1 hr at 90 °C. Subsequently, samples were neutralized using 40mM Tris-HCl.  
405 PCR was performed in PCR-ready tubes (Bioneer Inc. K-2016) containing 1µL of DNA



406 sample and 12.5 mM primers for a final reaction volume of 20 $\mu$ L adjusted with RNase-  
 407 free H<sub>2</sub>O. PCR genotyping primers sequences are documented in **Table 1**.  
 408

|                                  |                                                                                                                                                                                |
|----------------------------------|--------------------------------------------------------------------------------------------------------------------------------------------------------------------------------|
| <i>Glast</i> Cre <sup>ERT2</sup> | Forward sequence (5'-3'):<br>GAGGCACTTGGCTAGGCTCTGAGGA<br>Reverse sequence 1 (5'-3'):<br>GAGGAGATCCTGACCGATCAGTTGG<br>Reverse sequence 2 (5'-3'):<br>GGTGTACGGTCAGTAAATTGGACAT |
| <i>Cdh5</i> Cre <sup>ERT2</sup>  | Forward sequence (5'-3'):<br>AATCTCCCACCGTCAGTACG<br>Reverse sequence (5'-3'):<br>CGTTTTCTGAGCATACTGGA                                                                         |
| <i>MTMG</i>                      | MTMGC (Common) (5'-3'):<br>CTCTGCTGCCTCCTGGCTTCT<br>MTMGMR (mutant reverse) (5'-3'):<br>TCAATGGGCGGGGGTCGTT<br>MTMGWR (wild-type reverse) (5'-3'):<br>CGAGGCGGATCACAAGCAATA    |
| <i>Gja1</i>                      | Forward sequence (5'-3'):<br>ACAGCGGTTGAGTCAGCTTG<br>Reverse sequence (5'-3'):<br>GAGAGATGGGGAAGGACTTGT                                                                        |

409 **Table 1: PCR genotyping primers sequences**

410

411 **Tissue collection, subventricular zone (SVZ), rostral migratory stream (RMS) and**

412 **OB immunohistochemistry and imaging.** Mice were sacrificed with a lethal dose of

413 ketamine (80mg/kg body weight)/xylazine (8mg/kg body weight). Mice received trans-

414 cardiac infusion of 10mL sterile PBS supplemented with 2mM EDTA and 10U/mL heparin

415 followed by 10mL 3.7% formaldehyde. Brain tissues were post-fixed with 3.7%

416 formaldehyde at 4°C overnight. Post-fixation, brains were washed 3 times during 10 min

417 in PBS 1X. SVZ coronal sections, sagittal sections of the RMS and coronal sections of  
418 the OB were collected in a 24-well plate in a sequential manner and subsequently  
419 subjected to a free-floating slice immunostaining protocol. All sections were cut at 50  $\mu\text{m}$   
420 with a Leica vibratome (VT1000S). Briefly, slices were permeabilized with 0.5% Triton X-  
421 100 for 30 min at room temperature (RT). If EdU staining was required, we proceeded  
422 with EdU staining post-permeabilization following the manufacturer's protocol (Click-iT™  
423 – ThermoFischer C10337). Sections were then blocked with 10% donkey serum in PBS  
424 1X supplemented with 0.3% Triton X-100 (blocking buffer) for 1 hr at RT. After blocking,  
425 sections were incubated with appropriate primary antibodies (listed in **Table 2**) diluted in  
426 blocking buffer overnight at 4°C, on a low-speed rocking plate. Samples were washed  
427 three times with PBS 1X supplemented with 0.1% Triton X-100 (PBST) then incubated  
428 with respective conjugated secondary antibodies for 1 hr at RT. After 3 washes with  
429 PBST, Hoechst (4  $\mu\text{M}$ ) was added during 30 min for nucleus counterstaining. SVZ images  
430 were acquired with an inverted Leica SP8 DMI8 high-resolution confocal microscope  
431 equipped with adaptive deconvolution (LIGHTNING®, Leica) using 63x or 20x objectives.  
432 A series of 3 to 5 SVZ slices from each animal taken from the same rostro-caudal area,  
433 judged by the shape of the lateral ventricles, of the corpus callosum and the anterior  
434 commissure were imaged. We localized the RMS attached to the OB between a sagittal  
435 depth of 3.2-3.35mm from the lateral side of the brain toward the midline. For OB analysis,  
436 the whole OB was cut coronally. Images were post-analyzed using ImageJ and  
437 Photoshop (Adobe) software.

438

| <b>Antibody/catalogue number</b>   | <b>Species</b> | <b>Dilution</b> |
|------------------------------------|----------------|-----------------|
| Connexin 43 (Abcam ab11370)        | Rabbit         | 1:1000          |
| SOX2 (ebioscience 14-9811-82)      | Rat            | 1:100           |
| EGFR (Millipore 06-847)            | Rabbit         | 1:75            |
| Doublecortin (Abcam ab18723)       | Rabbit         | 1:200           |
| Doublecortin (AVES lab DCX)        | Chicken        | 1:200           |
| GFAP (DAKO Z0334)                  | Rabbit         | 1:400           |
| GFAP (AVES lab GFAP)               | Chicken        | 1:400           |
| PECAM1 (CD31) (Millipore MAB1398Z) | Hamster        | 1:100           |
| NeuN (Abcam ab104225)              | Rabbit         | 1:500           |
| S100 $\beta$ (DAKO Z0311)          | Rabbit         | 1:300           |
| CASPASE-3 (Cell signaling 9661S)   | Rabbit         | 1:200           |

439 **Table 2: Primary antibodies used for SVZ immunostaining**

440 **Evans blue permeability assay.** To assess changes in vascular permeability, mice  
441 received an i.p. injection of 2% Evans blue and were sacrificed 24 hr later. Prior to brain  
442 and liver harvesting, mice were infused with PBS 1X supplemented with 2mM EDTA and  
443 10U/mL heparin to wash out any traces of blood and maintain vessel integrity. Brains  
444 were post-fixed in 3.7% formaldehyde overnight and imaged using a dissecting  
445 microscope equipped with a digital camera (Leica).

446

447 **Vacupaint™ Silicone Rubber injection.** To assess changes in the brain  
448 microvaculature, mice were injected with 4 ml of Vascupaint (green) following the  
449 manufacturer's protocol (ediLumine™). Post-vascupaint injection, brains were harvested  
450 and post-fixed in 3.7% formaldehyde overnight. Brains were then dehydrated with 30%,  
451 60% and 100% methanol successively for 24h each. Post-dehydration, brains were  
452 clarified with 50:50 of Benzyl Benzoate: Benzyl alcohol for 48h and imaged using a Nikon  
453 SMZ-745T Trinocular 4K Digital Stereo microscope.

454

455 **Ara-C infusions.** Cytosine- $\beta$ -D-arabinofuranoside (Ara-C) infusions were performed  
456 as previously published<sup>6,64</sup>. Briefly, 2% Ara-C (Sigma) in 0.9% saline or saline alone was  
457 infused directly in the lateral ventricle (ipsilateral side) of adult mice (8-week-old) via a  
458 cannula (Alzet<sup>®</sup> brain infusion kit 3) implanted stereotaxically in a 1mm burr hole drilled  
459 on the surface of the brain at the following coordinates: 1.4 mm lateral and 0.5 mm rostral  
460 to bregma. Intracerebroventricular injection coordinates were verified with the injection of  
461 Fast Green dye 1% as previously described<sup>40</sup> (**Extended Figure 5**). The cannula was  
462 connected to a subcutaneously implanted mini-osmotic pump (Alzet<sup>®</sup> model 1007D flow  
463 rate 0.5 $\mu$ l/hr, 7 days). After 6 days of infusion, the pump was removed, and mice were  
464 sacrificed at the indicated survivals. The success of the Ara-C infusion was evaluated by  
465 immunostaining for the neuroblast marker, DCX and the proliferation marker EdU.

466

#### 467 **FACS isolation of primary ECs and NSCs from mouse brain cortex and SVZ.**

468 Primary ECs and NSCs from mouse brain cortex and SVZ were FACS-isolated  
469 following a detailed published protocol<sup>65</sup>. Briefly, brain cortex and SVZ were harvested (5  
470 brains at a time to maximize cell viability), minced into small pieces of  $\sim$ 1 x 1 mm in size.  
471 Minced pieces are then subjected to enzymatic dissociation in collagenase/dispase  
472 (Roche, 100mg/ml stock) solution for 30 min at 37°C in a hybridization oven with constant  
473 rotation. Subsequently, the digested tissues were triturated in 2% FBS in PBS  
474 supplemented with DNase (10 mg/ml stock solution) with a P1000 pipette ( $\sim$ 100x).  
475 Afterward, debris and myelin were removed with Percoll, cells were pelleted by  
476 centrifugation and resuspended in HBSS/BSA/glucose buffer for immunostaining.  
477 Antibodies (**Table 3**) were added to the resuspended cells (1  $\mu$ l of antibody/ $10^5$  cells) and  
478 incubated during 20 min on ice protected from light. Post-immunostaining cells were  
479 washed with HBSS/BSA/glucose buffer and filtered through a 40  $\mu$ m cell strainer. Cells  
480 isolated from the cortex were used as unstained, single-color and FMO controls (each  
481 combination of all antibodies except one), as well as isotype controls to set up gating and  
482 compensation strategy (**Extended Figure 3**). From SVZ CD45<sup>-</sup> cells, ECs (CD31<sup>+</sup>Glast<sup>-</sup>  
483 population) and NSCs (Glast<sup>+</sup>CD31<sup>-</sup> population) were collected using a BD FACS Melody  
484 cell sorter equipped with a 100  $\mu$ m nozzle in pre-filled FACS tubes with EC and NSC

485 media respectively to cushion the cells. Post-FACS processing, cells are pelleted, snap  
 486 frozen in liquid nitrogen and stored at -80 °C for RNA isolation.  
 487

| Antibody/catalogue number         | Isotype               |
|-----------------------------------|-----------------------|
| Glast-FITC (Alomone AGC-021-F)    | Rabbit IgG            |
| CD31-PE (BD Pharmingen™ 553373)   | Rat IgG <sub>2a</sub> |
| CD45-V450 (BD Pharmingen™ 560501) | Rat IgG <sub>2b</sub> |

488 **Table 3: Antibodies used for FACS**

489 **RNA isolation.** RNA from primary ECs and NSCs, as well as bEnd.3 and ANS4-GFP  
 490 cells, were purified using RNeasy Plus micro kit (Qiagen). 1 µg of RNA was reverse  
 491 transcribed using high-capacity cDNA Reverse transcription kit (Applied Biosystems™).  
 492 Quantitative PCR was performed on 15 ng cDNA using PowerUp SYBR Green Master  
 493 Mix (Applied Biosystems™) and the corresponding primers (**Table 4**). The data were first  
 494 normalized to actin level in each sample, and the relative expression levels of different  
 495 genes were calculated by the comparative Ct method<sup>66</sup>.

| Gene Name          | Forward primer (5'-3')  | Reverse primer (5'-3')    |
|--------------------|-------------------------|---------------------------|
| <i>Actin</i>       | AGAGGGAAATCGTGCGTGAC    | CAATAGTGATGACCTGGCCGT     |
| <i>Connexin 43</i> | ACAGCGGTTGAGTCAGCTTG    | GAGAGATGGGGAAGGACTTGT     |
| <i>Cyclin E</i>    | TTCTGCAGCGTCATCCTCT     | TTCTGCAGCGTCATCCTCT       |
| <i>EGFR</i>        | GCTTGCAACGGTTCTCTCTC    | CCACTGCCATTGAACGTACCCAG   |
| <i>GFAP</i>        | ACCATTCTGTACAGACTTTCTCC | AGTCTTTACCACGATGTTCCCTCTT |
| <i>Glast</i>       | AAGCATCACAGCCACGGCCG    | GTTCCGGAGGCGGTCCAGAAACC   |
| <i>Mash1</i>       | ATGCAGCTACTGTCCAAACG    | AACAGTAAGGGGTGGGTGTG      |
| <i>Nestin</i>      | CTGCAGGCCACTGAAAGTT     | GACCCTGCTTCTCCTGCTC       |

496 **Table 4: Mouse primers used for quantitative PCR**

497  
 498 **siRNA transfection.** *Cx43* siRNA (Smartpool siRNA *Cx43*, L-051694-00-0005) and  
 499 the negative control/SiScramble (Non-targeting pool siRNA, D-001810-10-05) were  
 500 purchased from Dharmacon. We transfected bEnd.3 cells when 70% confluent with 60nM  
 501 siRNA per six-well plate. Experimentally, lipofectamine RNAimax (Invitrogen) is mixed  
 502 with opti-MEM media (Gibco) and incubated at room temperature for 5 min (mix A). 60nM

503 of SiCx43 premixed Opti-MEM is then added to mix A and incubated for 15 min (mix B).  
504 Mix B is then added to bEnd.3 cells DMEM media (ATCC) without penicillin/streptomycin.  
505 The same protocol was used to transfect ANS4-GFP cells with 40nM of SiCx43. 60nM  
506 and 40nM of SiScramble (control) were used to transfect bEnd.3 and ANS4-GFP cells,  
507 respectively, for control experiments. Cells were used for experiments 72 hr post-  
508 transfection.

509 ***Gja1* overexpression in ANS4-GFP.** *Gja1* overexpression in ANS4-GFP was  
510 performed using a pcDNA3.1+ /C-(K)DYK vector containing *mus musculus Gja1 (Cx43)*  
511 cDNA (GenScript NM\_010288.3). Transfection was performed according to the  
512 manufacturer's experimental protocol in 6-well plate. To assess proliferation, EdU (5 $\mu$ M)  
513 was added to the culture media 24 hr post-transfection. At 48 hr post-transfection, NSC-  
514 GFP were collected for qPCR and western blot analysis to assess transgene expression  
515 or fixed for immunofluorescence studies to assess Cx43 expression and EdU uptake.

516 **Generation of Cx43 mutants.** Human *GJA1* (gene for *Cx43*) full length (FL) construct,  
517 Cx43 cytoplasmic tail truncated at amino acid 258 (*Cx43 $\Delta$ CT258*) and dead channel Cx43  
518 mutant (*Cx43T154A*, mutation that converts threonine 154 into alanine) were PCR-  
519 amplified from pTRE-TIGHT-Cx43-eYFP (gifted from Robin Shaw; Addgene Plasmid  
520 #31807) and cloned into the pcDNA3.1-HA (gifted from Oskar Laur; Addgene Plasmid  
521 #128034). We inserted the PCR fragments at NheI/BamHI sites by infusion HD-cloning  
522 (Takara Biosciences), to excise HA-tag from the plasmid, rendering the constructs  
523 expressed as tag-less. Site-directed mutagenesis was achieved using Q5-Site-Directed  
524 Mutagenesis Kit (NEB, USA), according to the manufacturer's protocol. Primers were  
525 designed using NEB-Base changer software (**Table 5**). Plasmids were sequenced and  
526 confirmed by Eurofin Sanger Sequencing Services, USA.

527

528

| Gene Name                                 | Primers                                                                                                                         |
|-------------------------------------------|---------------------------------------------------------------------------------------------------------------------------------|
| Human <i>GJA1</i> full length (FL)        | Forward primer 5'-3':<br>ACCCAAGCTGGCTAGCATGGGTGACTGGAGCGCC<br>Reverse primer 5'-3':<br>CTGGACTAGTGGATCCCTAGATCTCCAGGTCATCAGGCC |
| Human <i>Cx43<math>\Delta</math>CT258</i> | Forward primer 5'-3':<br>ACCCAAGCTGGCTAGCATGGGTGACTGGAGCGCC<br>Reverse primer 5'-3':<br>CTGGACTAGTGGATCCTTATTTGGCAGGGCTCAGCG    |
| Human <i>Cx43T154A</i>                    | Forward primer 5'-3':<br>GGGGTTGCTGCGAGCCTACATCATCAGTATCC<br>Reverse primer 5'-3':<br>GGATACTGATGATGTAGGCTCGCAGCAACCCC          |

529 **Table 5: Human *Cx43* full length (FL), *Cx43 $\Delta$ CT258* and *Cx43T154A* primers sequences.**

530

531 **Cell culture.** ANS4-GFP cells were gifted from Dr. Steve M. Pollard (University of  
532 Edinburgh). They were cultured as previously described<sup>67-69</sup>. bEnd.3 cells were  
533 purchased from (ATCC CRL-2299™) and cultured in Dulbecco's Modified Eagle's  
534 Medium (DMEM) (ATCC 30-2002) supplemented with 10% FBS and 1%  
535 penicillin/streptomycin. ANS4-GFP cells were used up to passage (P) 30 and bEnd.3 up  
536 to P16.

537

538 **Transwell co-culture of bEnd.3 and ANS4-GFP.** Transwell polycarbonate membranes  
539 of a 12-well plate (Corning, catalogue #3401) were activated with media and bottom sides  
540 were pre-coated with 0.1% gelatin for 1 hr at 37°C. The transwell inserts were then placed  
541 with bottom side facing up in a 100mm tissue culture dish pre-filled with DPBS and bEnd.3  
542 were then seeded. One hour later, inserts were flipped back in the wells of the 12-well  
543 plate pre-filled with bEnd.3 media and top side was coated with laminin (10µg/ml  
544 overnight at 37 °C). 24 hr-post-bEnd.3 seeding, the membrane was washed on both sides

545 with serum free media to remove any traces of serum that may cause differentiation of  
546 ANS4-GFP cells. ANS4-GFP cells were then seeded on the top side of membrane in  
547 ANS4 media without growth factors (EGF and FGF). bEnd.3 and ANS4 were co-cultured  
548 at a 1:2 ratio in 100% ANS4-GFP media (supplemented with 5 $\mu$ M EdU when needed).  
549 Membranes designated for ANS4-GFP monocultures were subjected to the same extra-  
550 cellular matrix coating proteins as co-culture studies. ANS4-GFP were harvested after 48  
551 hr of co-culture with trypsin for either qPCR analysis or fixed with 3.7% pre-warmed  
552 formaldehyde for immunofluorescence studies. For *Gja1* knock-down studies: bEnd.3 cells  
553 seeded on the bottom side of the membrane were transfected 24 hr before seeding ANS4-  
554 GFP cells on the top side and subjected to 48 hr of co-culture prior to harvest. For studies  
555 using si*Cx43* transfected ANS4-GFP: ANS4-GFP were transfected 24 hr prior to seeding  
556 on the top side of the membrane and harvested after 48 hr of co-culture. For studies using  
557 human *GJA1* mutants, ANS4-GFP and bEnd.3 were treated concomitantly with Si*Cx43*  
558 (see section siRNA transfection) and/or Cx43FL (1 $\mu$ g), Cx43T154A (0.5  $\mu$ g),  
559 Cx43CT $\Delta$ 258 (1  $\mu$ g) for 6 hr. After Si*Cx43* and DNA transfection, cells were subjected to  
560 a media change and harvested after 48 hr of co-culture. To block Cx43 channel activity,  
561 after 24 hr of co-culture, ANS4-GFP and bEnd.3 cells were both treated with 100nM of  
562 <sup>43</sup>gap 26 peptide (VCYDKSFPISHVR) (Genscript, catalogue # RP20274), every 8 hr for  
563 24 hr. To block ERK signaling in the co-culture system, ANS4-GFP cells were treated  
564 with 10 $\mu$ M of U0126 (Cell signaling catalogue #9903S) for 24 hr. ANS4-GFP were  
565 collected (6-8 wells are pooled per condition) either for qPCR or Western blot analysis  
566 after 48 hr of co-culture.

567 **Immunofluorescence of transwell membranes.** Insert wells were washed with  
568 DPBS supplemented with Ca<sup>2+</sup> and Mg<sup>2+</sup> allowing for cells to remain attached to the  
569 membrane. Cells were fixed with pre-warmed 3.7% formaldehyde in DPBS supplement  
570 with Ca<sup>2+</sup> and Mg<sup>2+</sup> for 15 min, then permeabilized with 0.5% Triton X-100 in PBS at room  
571 temperature for 20 min prior to EdU staining according to the manufacturer's protocol  
572 (Click-iT™, Invitrogen). Cells were then blocked with 10% donkey serum and 0.1% Triton  
573 X-100 (blocking buffer) for 1 hr at RT followed by incubation with primary antibodies,



574 chicken anti-GFP (1:500, Abcam ab13970) for NSCs and hamster anti-CD31 (1:500,  
575 Millipore MAB1398Z) for bEnd.3 cells, in blocking buffer at 4°C overnight and  
576 corresponding conjugated secondary antibodies for 1 hr at RT. Hoechst (5 µg/ml) was  
577 used for nuclear counterstaining. Membranes were cut out from inserts and mounted with  
578 DAKO mounting media (DAKO). Images were acquired with a DMI8 SP8 confocal  
579 microscope at 4 different viewing fields and analyzed in Image J.

580

581 **Bulk RNA sequencing.** mRNA samples from ANS4-GFP and ANS4-GFP cells co-  
582 cultured with bEnd.3 (for 72 hours) were isolated using RNeasy Plus Micro Kit (QIAGEN,  
583 cat# 74034). Next-generation whole transcriptome Illumina sequencing (HiSeq4000) was  
584 performed by the Yale Center for Genome Analysis. Fastq-files of raw reads were  
585 generated with bcl2fastq2\_v2.19.0 and then uploaded to the usegalaxy.org platform<sup>70</sup> for  
586 quality control and trimming (Galaxy ToolShed v 1.0.2; FASTQ/A short-reads pre-  
587 processing tools: [http://hannonlab.cshl.edu/fastx\\_toolkit/](http://hannonlab.cshl.edu/fastx_toolkit/))<sup>71,72</sup>. Sequences were aligned to  
588 the hg38genome using Kallisto<sup>73</sup> and aligned sequences were quantified with Sleuth<sup>74</sup>.  
589 Differential gene expression analysis was performed with the Sleuth package in R by the  
590 Likelihood Ratio Test with regression of the experiment number to account for batch  
591 effects.

592

593 **Western Blot.** Cells were lysed in RIPA buffer (Abcam, ab206996) and equal  
594 amounts of proteins (quantified according to the Pierce™ BCA™ assay kit manufacture's  
595 protocol, ThermoFischer, 23252) were separated on 4-15% gradient Criterion precast  
596 gels (Bio-Rad 567-1084). Proteins were then transferred onto nitrocellulose membranes  
597 (Bio-Rad). Western Blots were developed with chemiluminescence HRP substrate  
598 (Radiance plus, Azure Biosystems AC2103) on a digital image analyzer, Azure Imager  
599 c300.

600

601 **Label retaining cell (LRC) protocol.** The LRC protocol was carried out, as previously  
602 described. Briefly, wild-type mice received BrdU (7.5mg/ml) i.p injections twice daily for 5  
603 days and sacrificed 4 wk after the last injection. Quantification of connexin protein

604 colocalization with LRCs or ECs was performed on confocal z-stack images by a  
605 computational approach using FARSIGHT for nuclear segmentation and MATLAB  
606 programs as previously published in the lab<sup>33</sup>.

607

608 **Data analysis and statistics.** All continuous variables were represented as mean  $\pm$   
609 SEM. The Mann-Whitney non-parametric test for unpaired samples was used to analyze  
610 continuous variables between groups and p value  $\leq 0.05$  was considered statistically  
611 significant. All analyses were performed using Prism 8.0 software (GraphPad).

## 612 References:

- 613 1 Chaker, Z., Codega, P. & Doetsch, F. A mosaic world: puzzles revealed by adult neural  
614 stem cell heterogeneity. *Wiley Interdiscip Rev Dev Biol* **5**, 640-658,  
615 doi:10.1002/wdev.248 (2016).
- 616 2 Doetsch, F., Garcia-Verdugo, J. M. & Alvarez-Buylla, A. Cellular composition and three-  
617 dimensional organization of the subventricular germinal zone in the adult mammalian  
618 brain. *J Neurosci* **17**, 5046-5061 (1997).
- 619 3 Parras, C. M. *et al.* Divergent functions of the proneural genes Mash1 and Ngn2 in the  
620 specification of neuronal subtype identity. *Genes Dev* **16**, 324-338,  
621 doi:10.1101/gad.940902 (2002).
- 622 4 Pastrana, E., Cheng, L. C. & Doetsch, F. Simultaneous prospective purification of adult  
623 subventricular zone neural stem cells and their progeny. *Proc Natl Acad Sci U S A* **106**,  
624 6387-6392, doi:10.1073/pnas.0810407106 (2009).
- 625 5 Doetsch, F., Caille, I., Lim, D. A., Garcia-Verdugo, J. M. & Alvarez-Buylla, A.  
626 Subventricular zone astrocytes are neural stem cells in the adult mammalian brain. *Cell*  
627 **97**, 703-716, doi:10.1016/s0092-8674(00)80783-7 (1999).
- 628 6 Doetsch, F., Garcia-Verdugo, J. M. & Alvarez-Buylla, A. Regeneration of a germinal  
629 layer in the adult mammalian brain. *Proc Natl Acad Sci U S A* **96**, 11619-11624,  
630 doi:10.1073/pnas.96.20.11619 (1999).
- 631 7 Mirzadeh, Z., Merkle, F. T., Soriano-Navarro, M., Garcia-Verdugo, J. M. & Alvarez-  
632 Buylla, A. Neural stem cells confer unique pinwheel architecture to the ventricular  
633 surface in neurogenic regions of the adult brain. *Cell Stem Cell* **3**, 265-278,  
634 doi:10.1016/j.stem.2008.07.004 (2008).
- 635 8 Gleeson, J. G., Lin, P. T., Flanagan, L. A. & Walsh, C. A. Doublecortin is a microtubule-  
636 associated protein and is expressed widely by migrating neurons. *Neuron* **23**, 257-271,  
637 doi:10.1016/s0896-6273(00)80778-3 (1999).
- 638 9 Lois, C. & Alvarez-Buylla, A. Long-distance neuronal migration in the adult mammalian  
639 brain. *Science* **264**, 1145-1148, doi:10.1126/science.8178174 (1994).
- 640 10 Menezes, J. R., Smith, C. M., Nelson, K. C. & Luskin, M. B. The division of neuronal  
641 progenitor cells during migration in the neonatal mammalian forebrain. *Mol Cell*  
642 *Neurosci* **6**, 496-508, doi:10.1006/mcne.1995.0002 (1995).
- 643 11 Altman, J. Autoradiographic and histological studies of postnatal neurogenesis. IV. Cell  
644 proliferation and migration in the anterior forebrain, with special reference to persisting  
645 neurogenesis in the olfactory bulb. *J Comp Neurol* **137**, 433-457,  
646 doi:10.1002/cne.901370404 (1969).
- 647 12 Luskin, M. B. Restricted proliferation and migration of postnatally generated neurons  
648 derived from the forebrain subventricular zone. *Neuron* **11**, 173-189, doi:10.1016/0896-  
649 6273(93)90281-u (1993).
- 650 13 Corotto, F. S., Henegar, J. A. & Maruniak, J. A. Neurogenesis persists in the  
651 subependymal layer of the adult mouse brain. *Neurosci Lett* **149**, 111-114,  
652 doi:10.1016/0304-3940(93)90748-a (1993).
- 653 14 James, R., Kim, Y., Hockberger, P. E. & Szele, F. G. Subventricular zone cell migration:  
654 lessons from quantitative two-photon microscopy. *Front Neurosci* **5**, 30,  
655 doi:10.3389/fnins.2011.00030 (2011).
- 656 15 Obernier, K. *et al.* Adult Neurogenesis Is Sustained by Symmetric Self-Renewal and  
657 Differentiation. *Cell Stem Cell* **22**, 221-234 e228, doi:10.1016/j.stem.2018.01.003 (2018).

- 658 16 Silva-Vargas, V., Delgado, A. C. & Doetsch, F. Symmetric Stem Cell Division at the  
659 Heart of Adult Neurogenesis. *Neuron* **98**, 246-248, doi:10.1016/j.neuron.2018.04.005  
660 (2018).
- 661 17 Shen, Q. *et al.* Adult SVZ stem cells lie in a vascular niche: a quantitative analysis of  
662 niche cell-cell interactions. *Cell Stem Cell* **3**, 289-300, doi:10.1016/j.stem.2008.07.026  
663 (2008).
- 664 18 Tavazoie, M. *et al.* A specialized vascular niche for adult neural stem cells. *Cell Stem*  
665 *Cell* **3**, 279-288, doi:10.1016/j.stem.2008.07.025 (2008).
- 666 19 Calvo, C. F. *et al.* Vascular endothelial growth factor receptor 3 directly regulates murine  
667 neurogenesis. *Genes Dev* **25**, 831-844, doi:10.1101/gad.615311 (2011).
- 668 20 Jin, K. *et al.* Vascular endothelial growth factor (VEGF) stimulates neurogenesis in vitro  
669 and in vivo. *Proc Natl Acad Sci U S A* **99**, 11946-11950, doi:10.1073/pnas.182296499  
670 (2002).
- 671 21 Gomez-Gaviro, M. V. *et al.* Betacellulin promotes cell proliferation in the neural stem  
672 cell niche and stimulates neurogenesis. *Proc Natl Acad Sci U S A* **109**, 1317-1322,  
673 doi:10.1073/pnas.1016199109 (2012).
- 674 22 Ramirez-Castillejo, C. *et al.* Pigment epithelium-derived factor is a niche signal for  
675 neural stem cell renewal. *Nat Neurosci* **9**, 331-339, doi:10.1038/nn1657 (2006).
- 676 23 Crouch, E. E., Liu, C., Silva-Vargas, V. & Doetsch, F. Regional and stage-specific effects  
677 of prospectively purified vascular cells on the adult V-SVZ neural stem cell lineage. *J*  
678 *Neurosci* **35**, 4528-4539, doi:10.1523/JNEUROSCI.1188-14.2015 (2015).
- 679 24 Genet, N. & Hirschi, K. K. Understanding neural stem cell regulation in vivo and  
680 applying the insights to cell therapy for strokes. *Regen Med* **16**, 861-870,  
681 doi:10.2217/rme-2021-0022 (2021).
- 682 25 Ottone, C. *et al.* Direct cell-cell contact with the vascular niche maintains quiescent  
683 neural stem cells. *Nat Cell Biol* **16**, 1045-1056, doi:10.1038/ncb3045 (2014).
- 684 26 Bicker, F. *et al.* Neurovascular EGFL7 regulates adult neurogenesis in the subventricular  
685 zone and thereby affects olfactory perception. *Nat Commun* **8**, 15922,  
686 doi:10.1038/ncomms15922 (2017).
- 687 27 Miragall, F., Albiez, P., Bartels, H., de Vries, U. & Dermietzel, R. Expression of the gap  
688 junction protein connexin43 in the subependymal layer and the rostral migratory stream  
689 of the mouse: evidence for an inverse correlation between intensity of connexin43  
690 expression and cell proliferation activity. *Cell Tissue Res* **287**, 243-253,  
691 doi:10.1007/s004410050749 (1997).
- 692 28 Nadarajah, B., Jones, A. M., Evans, W. H. & Parnavelas, J. G. Differential expression of  
693 connexins during neocortical development and neuronal circuit formation. *J Neurosci* **17**,  
694 3096-3111 (1997).
- 695 29 Bittman, K. S. & LoTurco, J. J. Differential regulation of connexin 26 and 43 in murine  
696 neocortical precursors. *Cereb Cortex* **9**, 188-195, doi:10.1093/cercor/9.2.188 (1999).
- 697 30 Hirschi, K. K., Burt, J. M., Hirschi, K. D. & Dai, C. Gap junction communication  
698 mediates transforming growth factor-beta activation and endothelial-induced mural cell  
699 differentiation. *Circ Res* **93**, 429-437, doi:10.1161/01.RES.0000091259.84556.D5  
700 (2003).
- 701 31 Swayne, L. A. & Bennett, S. A. Connexins and pannexins in neuronal development and  
702 adult neurogenesis. *BMC Cell Biol* **17 Suppl 1**, 10, doi:10.1186/s12860-016-0089-5  
703 (2016).

- 704 32 Zhao, Y., Xin, Y., He, Z. & Hu, W. Function of Connexins in the Interaction between  
705 Glial and Vascular Cells in the Central Nervous System and Related Neurological  
706 Diseases. *Neural Plast* **2018**, 6323901, doi:10.1155/2018/6323901 (2018).
- 707 33 Goldberg, J. S., Vadakkan, T. J., Hirschi, K. K. & Dickinson, M. E. A computational  
708 approach to detect gap junction plaques and associate them with cells in fluorescent  
709 images. *J Histochem Cytochem* **61**, 283-293, doi:10.1369/0022155413477114 (2013).
- 710 34 Brazel, C. Y. *et al.* Sox2 expression defines a heterogeneous population of neurosphere-  
711 forming cells in the adult murine brain. *Aging Cell* **4**, 197-207, doi:10.1111/j.1474-  
712 9726.2005.00158.x (2005).
- 713 35 Mercurio, S., Serra, L. & Nicolis, S. K. More than just Stem Cells: Functional Roles of  
714 the Transcription Factor Sox2 in Differentiated Glia and Neurons. *Int J Mol Sci* **20**,  
715 doi:10.3390/ijms20184540 (2019).
- 716 36 Boulay, A. C. *et al.* Immune quiescence of the brain is set by astroglial connexin 43. *J*  
717 *Neurosci* **35**, 4427-4439, doi:10.1523/JNEUROSCI.2575-14.2015 (2015).
- 718 37 Chew, S. S., Johnson, C. S., Green, C. R. & Danesh-Meyer, H. V. Role of connexin43 in  
719 central nervous system injury. *Exp Neurol* **225**, 250-261,  
720 doi:10.1016/j.expneurol.2010.07.014 (2010).
- 721 38 Danesh-Meyer, H. V. & Green, C. R. Focus on molecules: connexin 43--mind the gap.  
722 *Exp Eye Res* **87**, 494-495, doi:10.1016/j.exer.2008.01.021 (2008).
- 723 39 Kokovay, E. *et al.* VCAM1 is essential to maintain the structure of the SVZ niche and  
724 acts as an environmental sensor to regulate SVZ lineage progression. *Cell Stem Cell* **11**,  
725 220-230, doi:10.1016/j.stem.2012.06.016 (2012).
- 726 40 DeVos, S. L. & Miller, T. M. Direct intraventricular delivery of drugs to the rodent  
727 central nervous system. *J Vis Exp*, e50326, doi:10.3791/50326 (2013).
- 728 41 Beahm, D. L. *et al.* Mutation of a conserved threonine in the third transmembrane helix  
729 of alpha- and beta-connexins creates a dominant-negative closed gap junction channel. *J*  
730 *Biol Chem* **281**, 7994-8009, doi:10.1074/jbc.M506533200 (2006).
- 731 42 Maass, K., Shibayama, J., Chase, S. E., Willecke, K. & Delmar, M. C-terminal truncation  
732 of connexin43 changes number, size, and localization of cardiac gap junction plaques.  
733 *Circ Res* **101**, 1283-1291, doi:10.1161/CIRCRESAHA.107.162818 (2007).
- 734 43 Genet, N., Bhatt, N., Bourdieu, A. & Hirschi, K. K. Multifaceted Roles of Connexin 43 in  
735 Stem Cell Niches. *Curr Stem Cell Rep* **4**, 1-12, doi:10.1007/s40778-018-0110-3 (2018).
- 736 44 Moorer, M. C. *et al.* Defective signaling, osteoblastogenesis and bone remodeling in a  
737 mouse model of connexin 43 C-terminal truncation. *J Cell Sci* **130**, 531-540,  
738 doi:10.1242/jcs.197285 (2017).
- 739 45 Andreu-Agullo, C., Morante-Redolat, J. M., Delgado, A. C. & Farinas, I. Vascular niche  
740 factor PEDF modulates Notch-dependent stemness in the adult subependymal zone. *Nat*  
741 *Neurosci* **12**, 1514-1523, doi:10.1038/nn.2437 (2009).
- 742 46 Kirschenbaum, B. & Goldman, S. A. Brain-derived neurotrophic factor promotes the  
743 survival of neurons arising from the adult rat forebrain subependymal zone. *Proc Natl*  
744 *Acad Sci U S A* **92**, 210-214, doi:10.1073/pnas.92.1.210 (1995).
- 745 47 Kokovay, E. *et al.* Adult SVZ lineage cells home to and leave the vascular niche via  
746 differential responses to SDF1/CXCR4 signaling. *Cell Stem Cell* **7**, 163-173,  
747 doi:10.1016/j.stem.2010.05.019 (2010).

- 748 48 Leventhal, C., Rafii, S., Rafii, D., Shahar, A. & Goldman, S. A. Endothelial trophic  
749 support of neuronal production and recruitment from the adult mammalian subependyma.  
750 *Mol Cell Neurosci* **13**, 450-464, doi:10.1006/mcne.1999.0762 (1999).
- 751 49 Snappyan, M. *et al.* Vasculature guides migrating neuronal precursors in the adult  
752 mammalian forebrain via brain-derived neurotrophic factor signaling. *J Neurosci* **29**,  
753 4172-4188, doi:10.1523/JNEUROSCI.4956-08.2009 (2009).
- 754 50 Cheng, A. *et al.* Gap junctional communication is required to maintain mouse cortical  
755 neural progenitor cells in a proliferative state. *Dev Biol* **272**, 203-216,  
756 doi:10.1016/j.ydbio.2004.04.031 (2004).
- 757 51 Duval, N. *et al.* Cell coupling and Cx43 expression in embryonic mouse neural  
758 progenitor cells. *J Cell Sci* **115**, 3241-3251 (2002).
- 759 52 Ravella, A., Ringstedt, T., Brion, J. P., Pandolfo, M. & Herlenius, E. Adult neural  
760 precursor cells form connexin-dependent networks that improve their survival.  
761 *Neuroreport* **26**, 928-936, doi:10.1097/WNR.0000000000000451 (2015).
- 762 53 Todorova, M. G., Soria, B. & Quesada, I. Gap junctional intercellular communication is  
763 required to maintain embryonic stem cells in a non-differentiated and proliferative state. *J*  
764 *Cell Physiol* **214**, 354-362, doi:10.1002/jcp.21203 (2008).
- 765 54 Gairhe, S., Bauer, N. N., Gebb, S. A. & McMurtry, I. F. Myoendothelial gap junctional  
766 signaling induces differentiation of pulmonary arterial smooth muscle cells. *Am J Physiol*  
767 *Lung Cell Mol Physiol* **301**, L527-535, doi:10.1152/ajplung.00091.2011 (2011).
- 768 55 Isakson, B. E. & Duling, B. R. Heterocellular contact at the myoendothelial junction  
769 influences gap junction organization. *Circ Res* **97**, 44-51,  
770 doi:10.1161/01.RES.0000173461.36221.2e (2005).
- 771 56 Matta, R. *et al.* Minimally Invasive Delivery of Microbeads with Encapsulated, Viable  
772 and Quiescent Neural Stem Cells to the Adult Subventricular Zone. *Sci Rep* **9**, 17798,  
773 doi:10.1038/s41598-019-54167-1 (2019).
- 774 57 Warn-Cramer, B. J. *et al.* Characterization of the mitogen-activated protein kinase  
775 phosphorylation sites on the connexin-43 gap junction protein. *J Biol Chem* **271**, 3779-  
776 3786, doi:10.1074/jbc.271.7.3779 (1996).
- 777 58 Solan, J. L., Marquez-Rosado, L. & Lampe, P. D. Cx43 phosphorylation-mediated effects  
778 on ERK and Akt protect against ischemia reperfusion injury and alter the stability of the  
779 stress-inducible protein NDRG1. *J Biol Chem* **294**, 11762-11771,  
780 doi:10.1074/jbc.RA119.009162 (2019).
- 781 59 Sorensen, I., Adams, R. H. & Gossler, A. DLL1-mediated Notch activation regulates  
782 endothelial identity in mouse fetal arteries. *Blood* **113**, 5680-5688, doi:10.1182/blood-  
783 2008-08-174508 (2009).
- 784 60 Wang, Y. *et al.* Ephrin-B2 controls VEGF-induced angiogenesis and lymphangiogenesis.  
785 *Nature* **465**, 483-486, doi:10.1038/nature09002 (2010).
- 786 61 Mori, T. *et al.* Inducible gene deletion in astroglia and radial glia--a valuable tool for  
787 functional and lineage analysis. *Glia* **54**, 21-34, doi:10.1002/glia.20350 (2006).
- 788 62 Cotsarelis, G., Cheng, S. Z., Dong, G., Sun, T. T. & Lavker, R. M. Existence of slow-  
789 cycling limbal epithelial basal cells that can be preferentially stimulated to proliferate:  
790 implications on epithelial stem cells. *Cell* **57**, 201-209, doi:10.1016/0092-  
791 8674(89)90958-6 (1989).
- 792 63 Potten, C. S. & Morris, R. J. Epithelial stem cells in vivo. *J Cell Sci Suppl* **10**, 45-62,  
793 doi:10.1242/jcs.1988.supplement\_10.4 (1988).

794 64 Kazanis, I. *et al.* Quiescence and activation of stem and precursor cell populations in the  
795 subependymal zone of the mammalian brain are associated with distinct cellular and  
796 extracellular matrix signals. *J Neurosci* **30**, 9771-9781, doi:10.1523/JNEUROSCI.0700-  
797 10.2010 (2010).

798 65 Crouch, E. E. & Doetsch, F. FACS isolation of endothelial cells and pericytes from  
799 mouse brain microregions. *Nat Protoc* **13**, 738-751, doi:10.1038/nprot.2017.158 (2018).

800 66 Livak, K. J. & Schmittgen, T. D. Analysis of relative gene expression data using real-  
801 time quantitative PCR and the 2(-Delta Delta C(T)) Method. *Methods* **25**, 402-408,  
802 doi:10.1006/meth.2001.1262 (2001).

803 67 Pollard, S. M. In vitro expansion of fetal neural progenitors as adherent cell lines.  
804 *Methods Mol Biol* **1059**, 13-24, doi:10.1007/978-1-62703-574-3\_2 (2013).

805 68 Conti, L. *et al.* Niche-independent symmetrical self-renewal of a mammalian tissue stem  
806 cell. *PLoS Biol* **3**, e283, doi:10.1371/journal.pbio.0030283 (2005).

807 69 Pollard, S. M. & Conti, L. Investigating radial glia in vitro. *Prog Neurobiol* **83**, 53-67,  
808 doi:10.1016/j.pneurobio.2007.02.008 (2007).

809 70 Afgan, E. *et al.* The Galaxy platform for accessible, reproducible and collaborative  
810 biomedical analyses: 2018 update. *Nucleic Acids Res* **46**, W537-W544,  
811 doi:10.1093/nar/gky379 (2018).

812 71 Blankenberg, D. *et al.* Manipulation of FASTQ data with Galaxy. *Bioinformatics* **26**,  
813 1783-1785, doi:10.1093/bioinformatics/btq281 (2010).

814 72 Blankenberg, D. *et al.* Galaxy: a web-based genome analysis tool for experimentalists.  
815 *Curr Protoc Mol Biol* **Chapter 19**, Unit 19 10 11-21,  
816 doi:10.1002/0471142727.mb1910s89 (2010).

817 73 Bray, N. L., Pimentel, H., Melsted, P. & Pachter, L. Near-optimal probabilistic RNA-seq  
818 quantification. *Nat Biotechnol* **34**, 525-527, doi:10.1038/nbt.3519 (2016).

819 74 Pimentel, H., Bray, N. L., Puente, S., Melsted, P. & Pachter, L. Differential analysis of  
820 RNA-seq incorporating quantification uncertainty. *Nat Methods* **14**, 687-690,  
821 doi:10.1038/nmeth.4324 (2017).

822

**a**

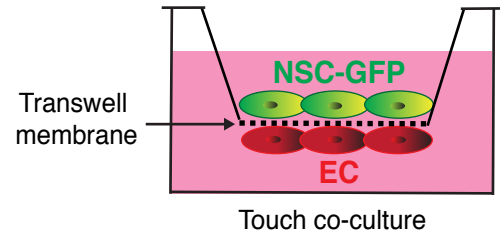

**b**

bioRxiv preprint doi: <https://doi.org/10.1101/2022.02.28.482353>; this version posted March 1, 2022. The copyright holder for this preprint (which was not certified by peer review) is the author/funder, who has granted bioRxiv a license to display the preprint in perpetuity. It is made available under aCC-BY-NC-ND 4.0 International license.

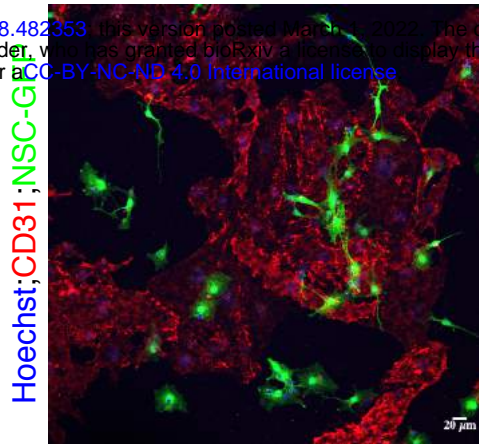

**c**

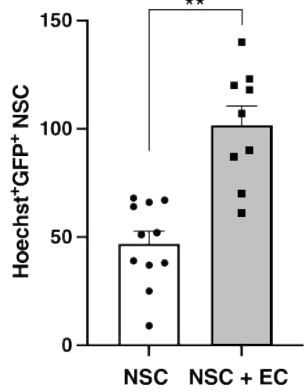

**d**

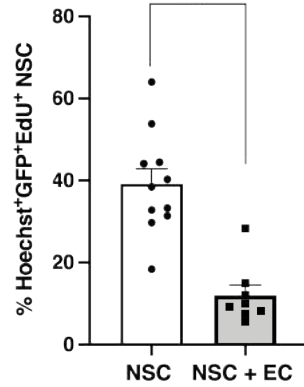

**e**

Differential genes expressions in NSC co-cultured with EC vs. NSC alone

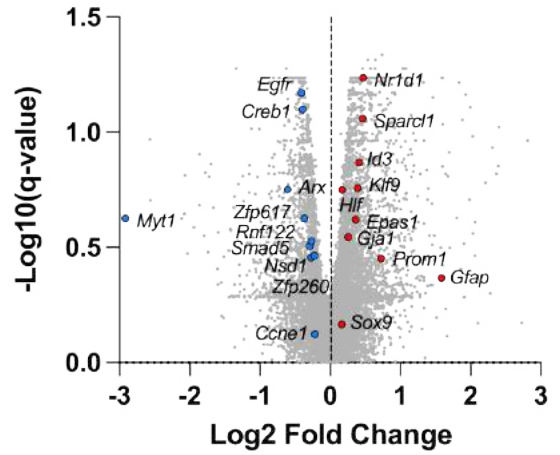

**f**

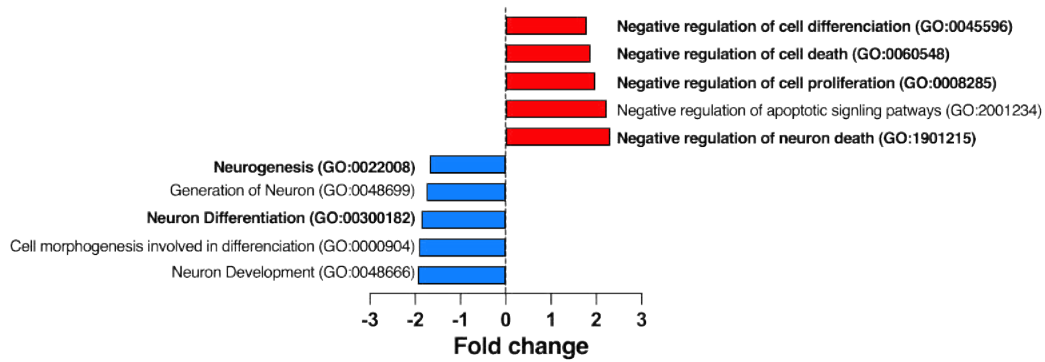

**g**

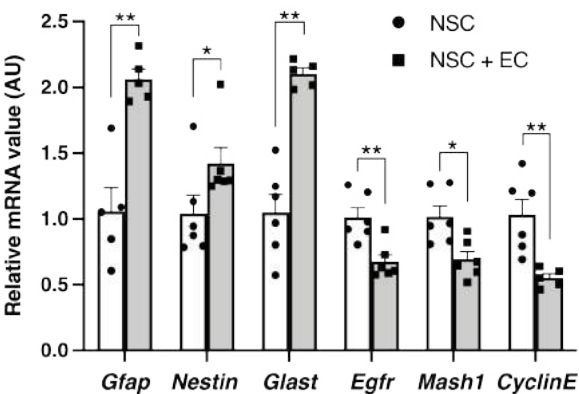

**h**

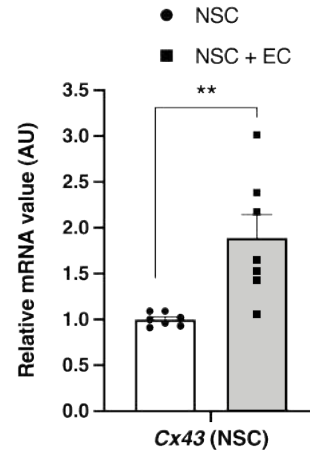

**i**

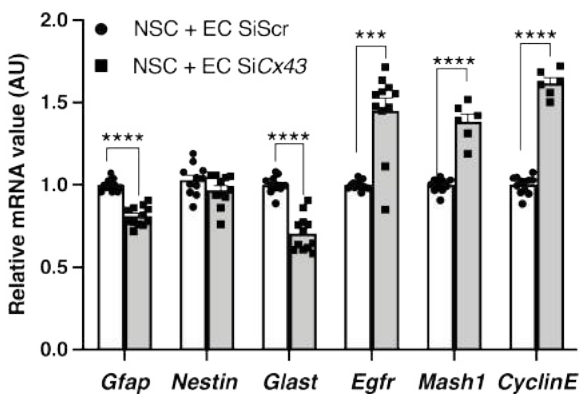



**Figure 1: NSC-EC co-culture decreases NSC proliferation in a Cx43-dependent manner.** (a) Schematic representation for transwell touch co-culture of vascular ECs (bottom side) with GFP<sup>+</sup>NSCs (top side). (b) Confocal image showing CD31<sup>+</sup> EC (red) and GFP<sup>+</sup> NSCs (green) co-cultured on the transwell membrane. (c) Quantification of total GFP<sup>+</sup>NSCs number and (d) percentage of GFP<sup>+</sup>NSCs with EdU uptake when cultured alone or with ECs respectively (n=3-4 biological replicates, 4 viewing fields/n). (e) Volcano plot of differential genes expressions in NSCs co-cultured with ECs compared to NSCs cultured alone. Red and blue dots indicated selected upregulated or downregulated genes respectively (n=3 biological replicates). (f) Gene ontology term analysis of selected gene family modified in NSCs co-cultured with ECs compared to NSCs cultured alone. (g) qPCR analysis of quiescent and activated genes in NSCs alone or NSCs co-cultured with ECs (n=3 biological replicates). (h) qPCR analysis of *Cx43* gene expression in NSCs alone or NSCs co-cultured with ECs (n=3 biological replicates). (i) qPCR analysis of quiescent and activated genes in NSCs co-cultured with ECs, where ECs are treated with control siRNA (siScr) or *Cx43* siRNA (Si*Cx43*) (n=3 different experiments). Data are mean  $\pm$  SEM. \* $p \leq 0.05$ , \*\* $p \leq 0.01$ , \*\*\*  $p \leq 0.001$ .

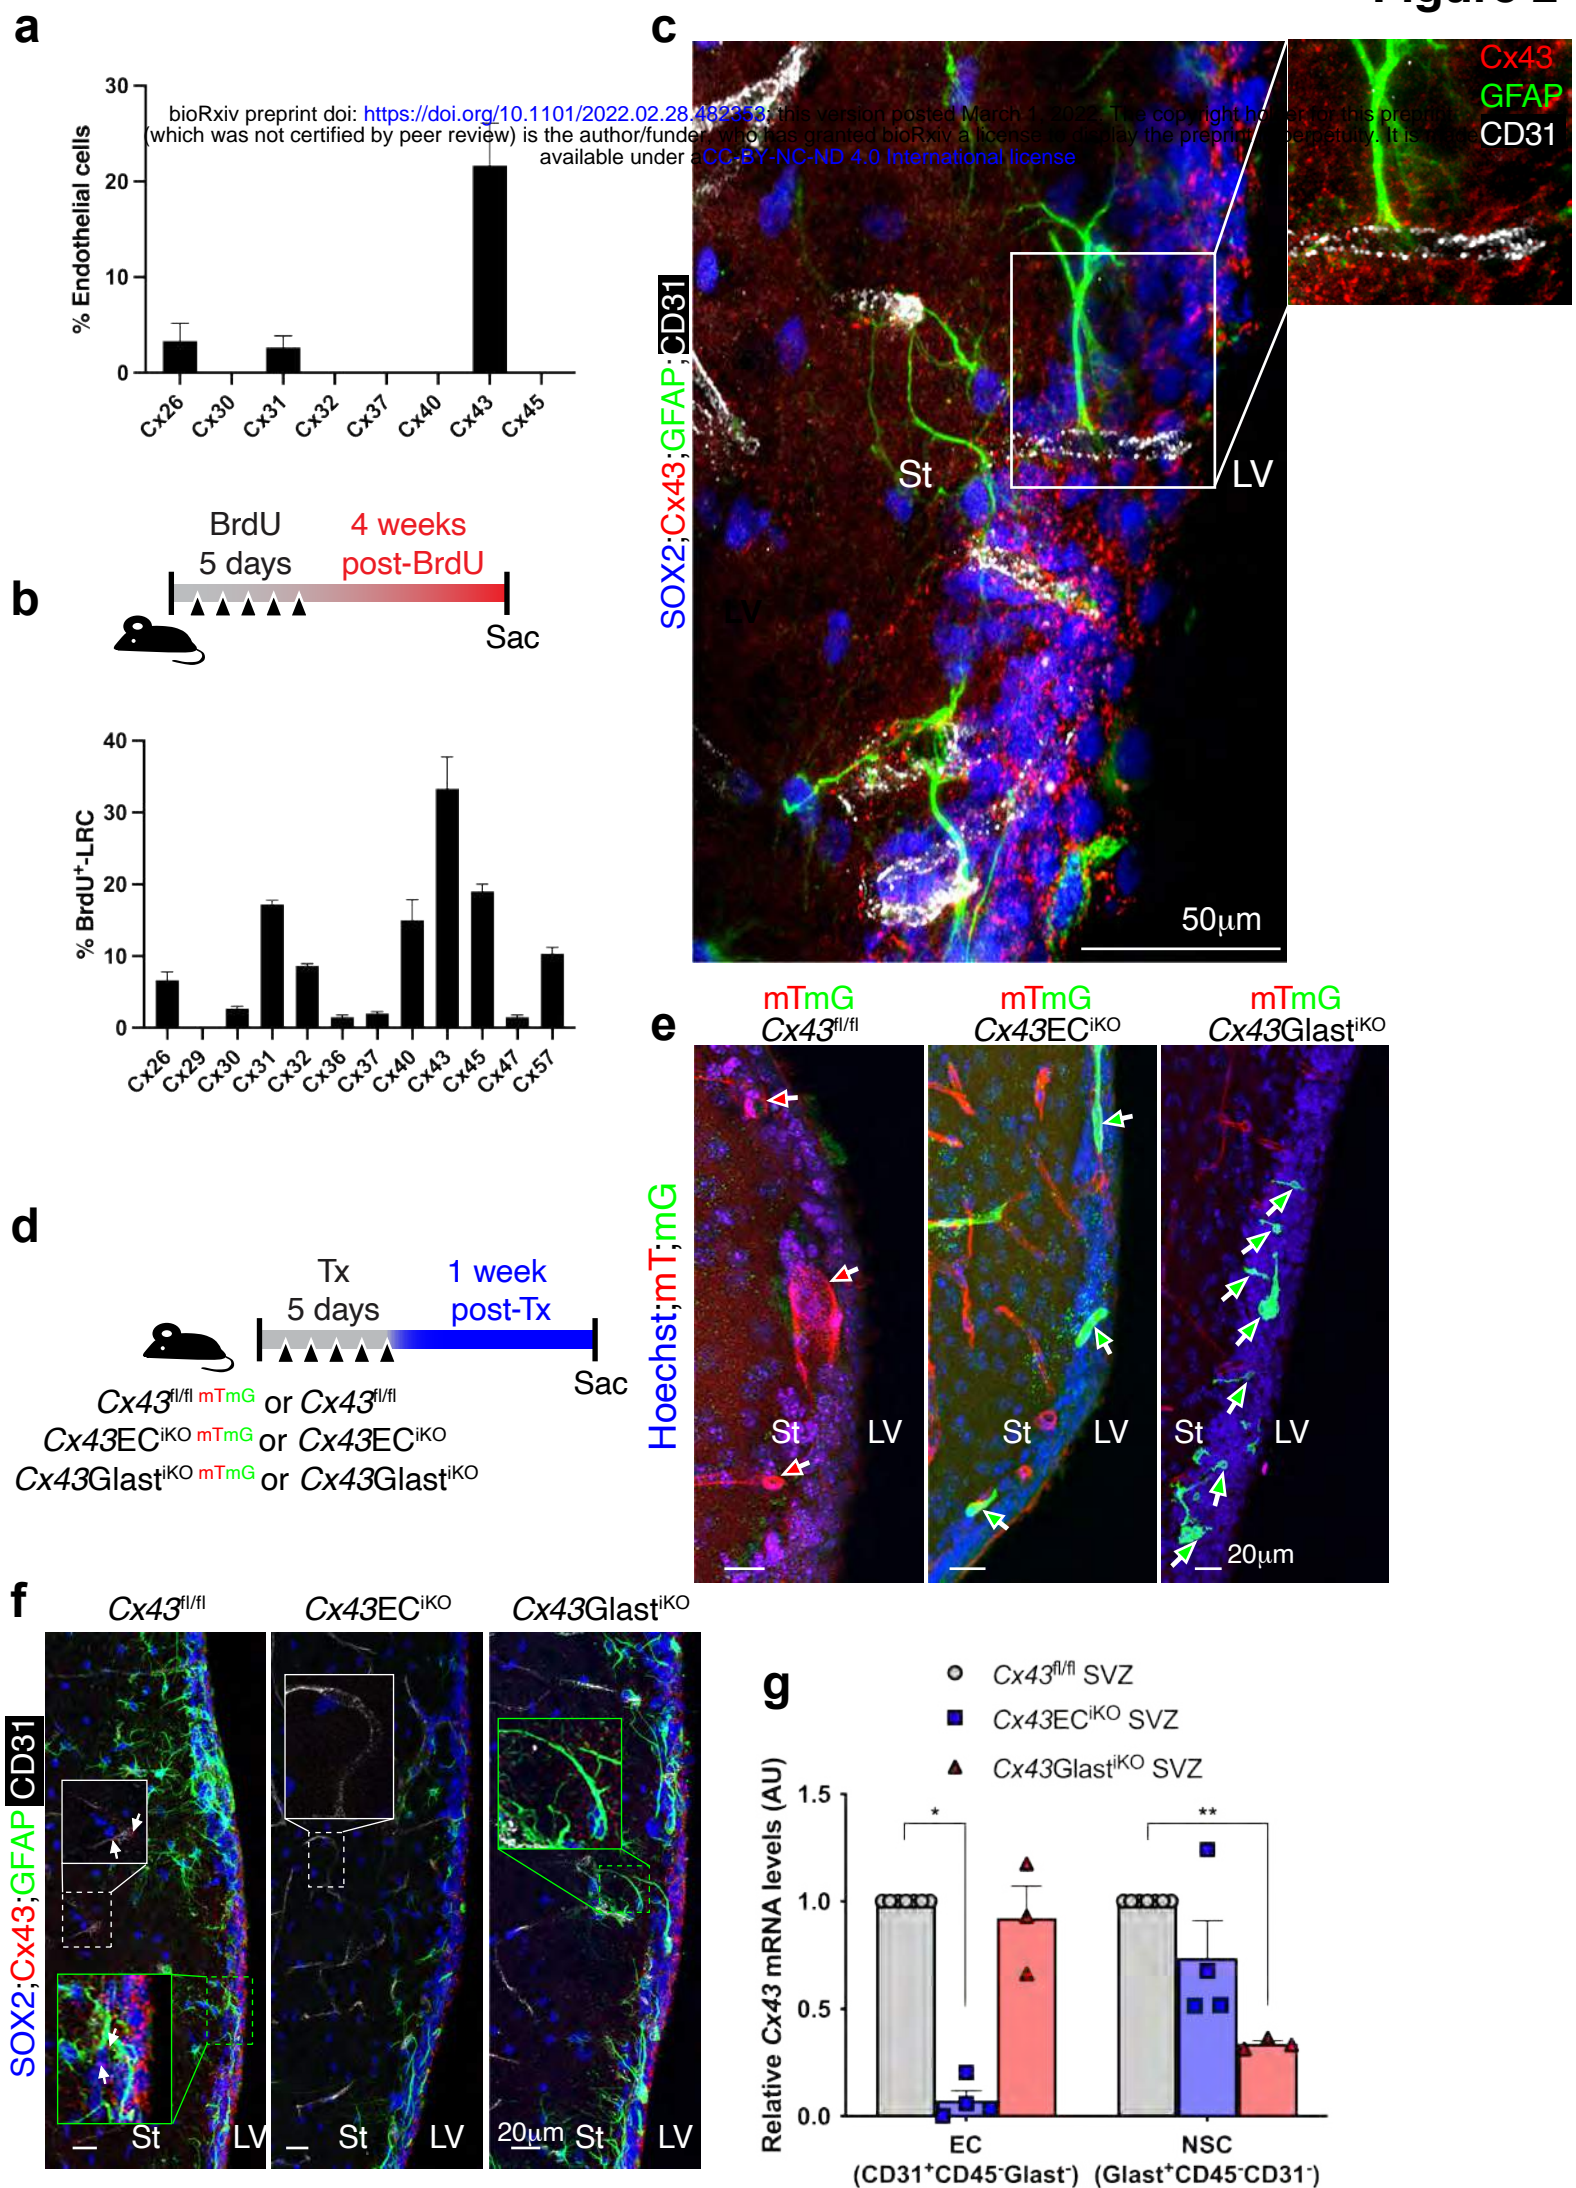

**Figure 2: ECs and NSCs in the adult brain SVZ highly express Cx43.**

(a) and (b) Quantifications of the percentage of CD31<sup>+</sup>EC and BrdU<sup>+</sup>-LRC<sup>+</sup> quiescent NSCs colocalizing with different Cx proteins respectively. (c) High resolution confocal image of a coronal section from a control mouse brain SVZ showing the end-feet of GFAP<sup>+</sup>SOX2<sup>+</sup> NSCs (green and blue) contacting CD31<sup>+</sup> endothelial cells via Cx43 punctate (inset). Scale bar is 50  $\mu$ m. (d) Timeline used to evaluate Cx43 deletion and recombination in the SVZ. (e) Representative confocal images of SVZ from Cx43<sup>EC</sup><sup>iKO</sup>;ROSA<sup>mT/mG</sup> and Cx43<sup>Glast</sup><sup>iKO</sup>;ROSA<sup>mT/mG</sup> mice. Note the presence of green recombinant ECs or NSCs (green arrows) and only red tomato cells in the Cx43<sup>fl/fl</sup>;ROSA<sup>mT/mG</sup> SVZ (red arrows). (f) Representative confocal images of Cx43 immunostaining in the SVZ of Cx43<sup>fl/fl</sup>, Cx43<sup>EC</sup><sup>iKO</sup> and Cx43<sup>Glast</sup><sup>iKO</sup> mice. Note that Cx43 punctate staining (white arrows) in ECs (white inset) and NSC (green inset) are specifically deleted in Cx43<sup>EC</sup><sup>iKO</sup> and Cx43<sup>Glast</sup><sup>iKO</sup> SVZ respectively. (g) Cx43 mRNA expression in ECs (CD31<sup>+</sup>CD45<sup>-</sup>Glast<sup>-</sup> population) and NSCs (Glast<sup>+</sup>CD45<sup>-</sup>CD31<sup>-</sup> population) of Cx43<sup>fl/fl</sup>, Cx43<sup>EC</sup><sup>iKO</sup> and Cx43<sup>Glast</sup><sup>iKO</sup> SVZ (n=3-4 different experiments, 5 SVZs per pooled experiment). Scale bar is 20  $\mu$ m. St: Striatum; LV: Lateral ventricle. Data are mean  $\pm$  SEM. \* $p \leq 0.05$ , \*\* $p \leq 0.01$ .

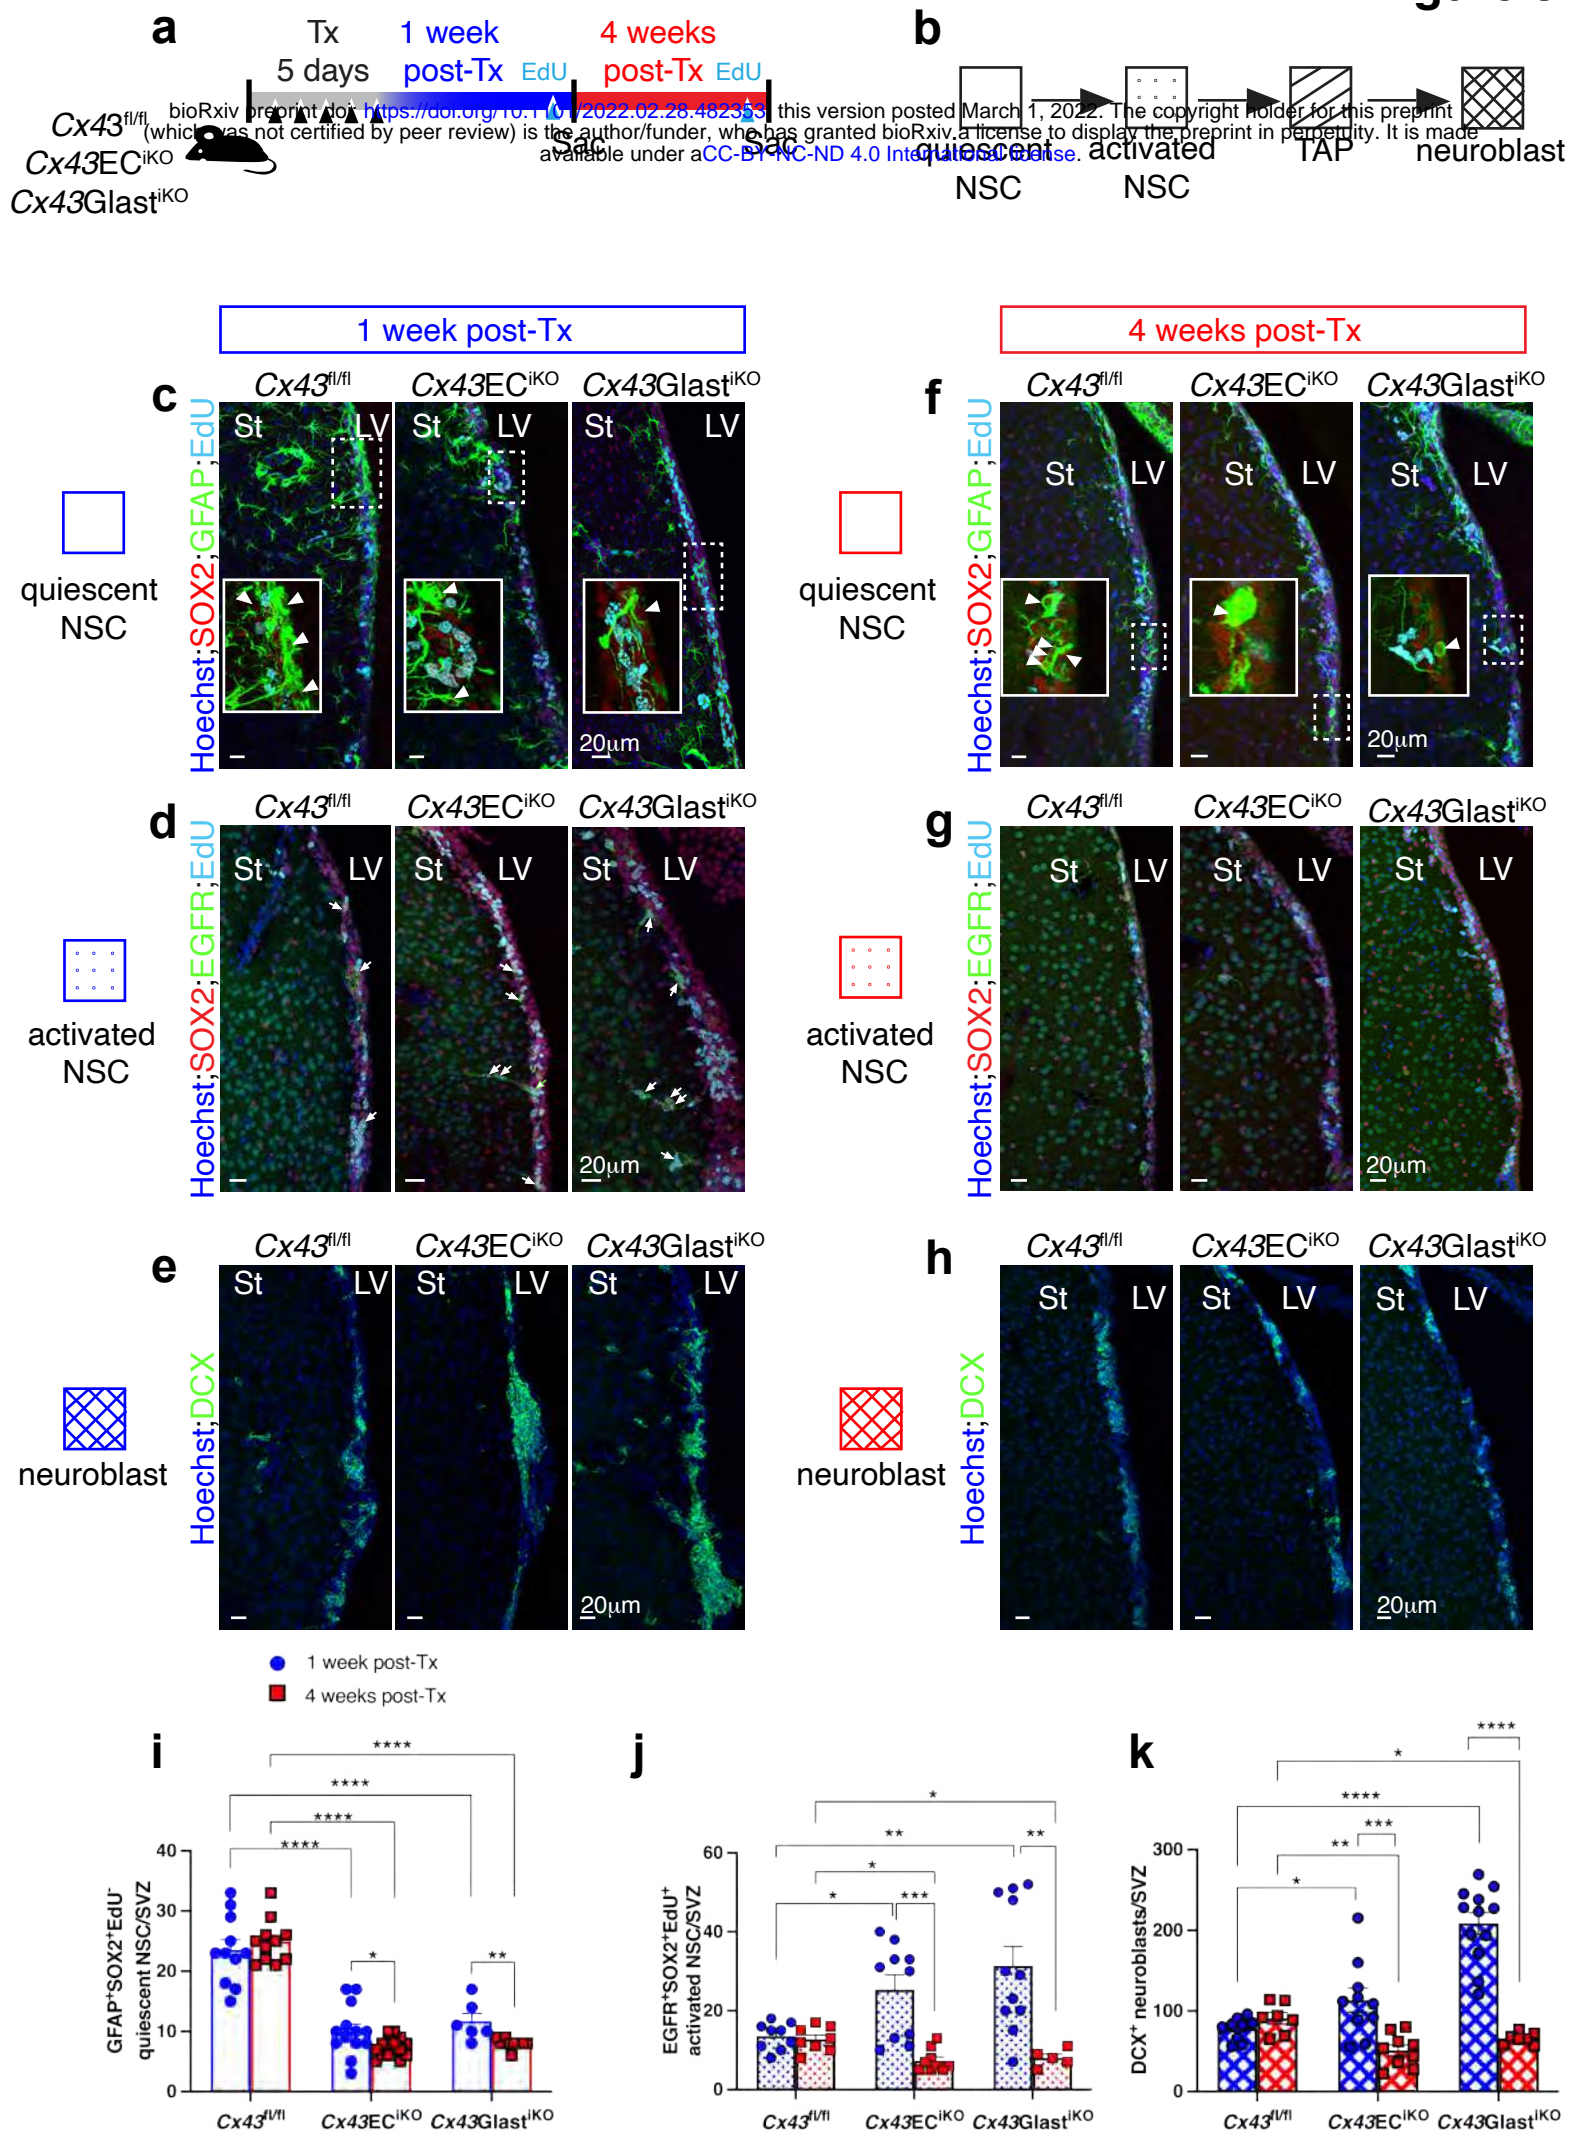

**Figure 3: *Cx43* deletion in ECs or NSCs depletes quiescent NSCs in the adult SVZ.**

(a) Timeline used to evaluate the effects of short-term deletion (1-week post-Tx) vs long-term deletion (4-weeks post-Tx) of *Cx43* on the number of quiescent NSCs, activated NSCs and neuroblasts in the SVZ. (b) Schematic model of quiescent NSCs activation and differentiation in the SVZ. (c) to (h) Confocal images of SVZ coronal sections from *Cx43<sup>fl/fl</sup>*, *Cx43EC<sup>iKO</sup>* and *Cx43Glast<sup>iKO</sup>* mice showing in (c) and (f) quiescent GFAP<sup>+</sup>SOX2<sup>+</sup>EdU<sup>-</sup> NSC (arrowheads), (d) and (g) EGFR<sup>+</sup>SOX2<sup>+</sup>EdU<sup>+</sup> activated NSCs (arrows in d); (e) and (h) DCX<sup>+</sup> neuroblasts. (i) to (k) Quantifications of images shown in (c) to (h) (n=3-5 different animals per group). Scale bar is 20  $\mu$ m. St: Striatum; LV: Lateral ventricle. Data are mean  $\pm$  SEM. \* $p \leq 0.05$ , \*\* $p \leq 0.01$ , \*\*\*\* $p \leq 0.001$ .

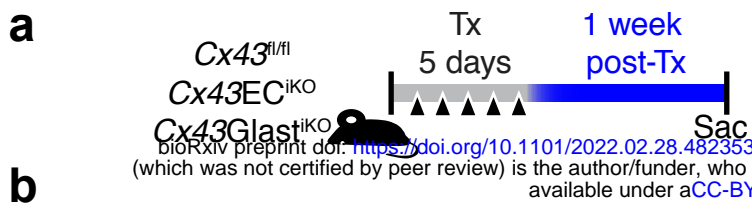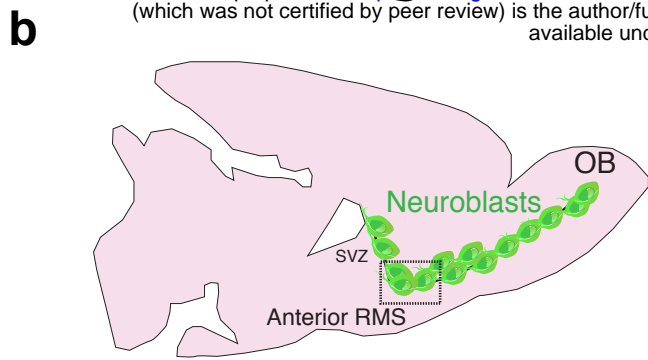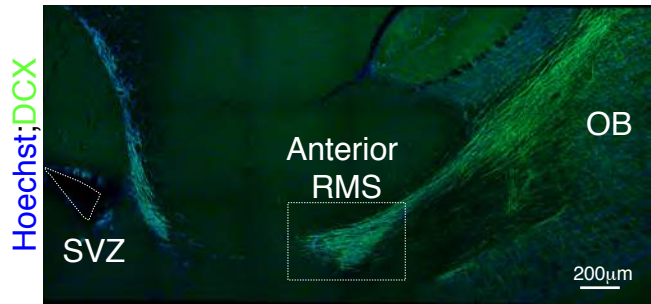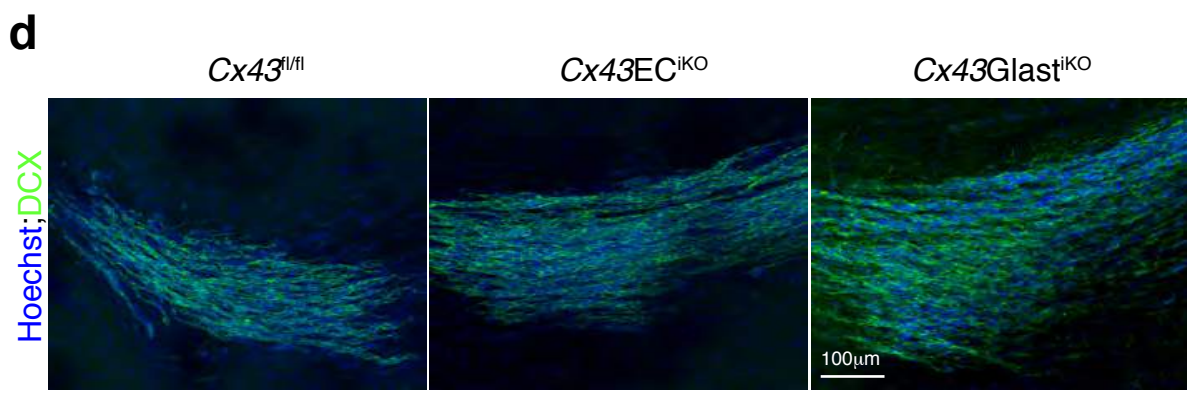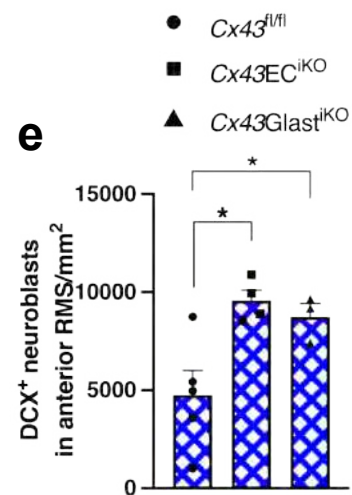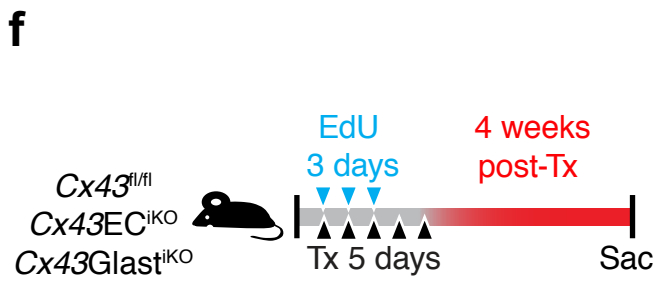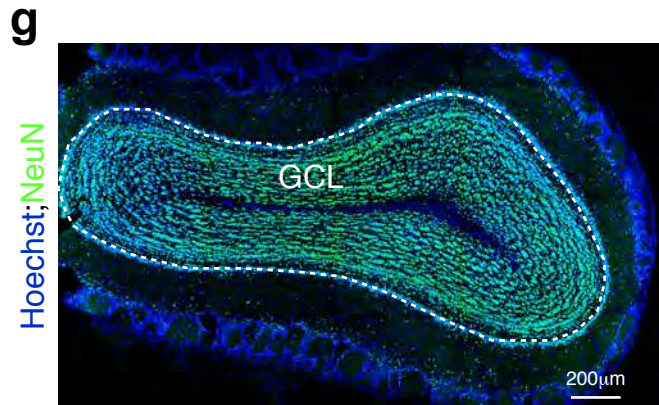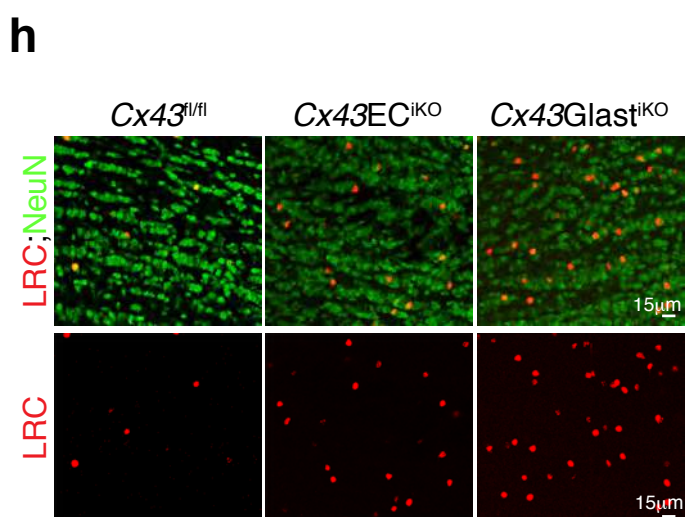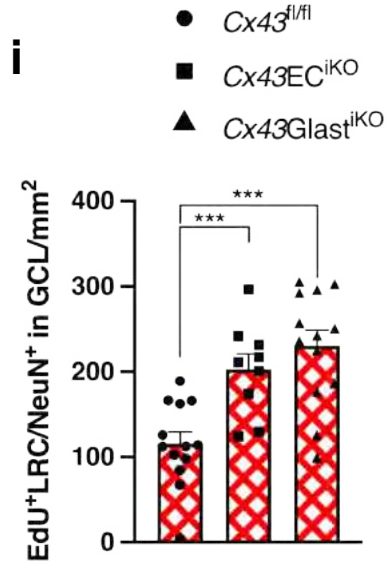

**Figure 4: *Cx43* deletion in ECs or NSCs increases neuroblast generation in the RMS and neurogenesis in the OB.**

(a) Timeline used to evaluate the effects of short-term deletion of *Cx43* on neuroblasts in the RMS. (b) Schematic representation of a mouse brain coronal section (50  $\mu\text{m}$ ) showing the RMS. (c) a representative confocal image of DCX<sup>+</sup> neuroblasts in the RMS. Dashed boxes in (b) and (c) highlight the anterior RMS. (d) Representative confocal images of DCX<sup>+</sup> neuroblasts in the anterior RMS of *Cx43*<sup>fl/fl</sup>, *Cx43*EC<sup>iKO</sup> and *Cx43*Glast<sup>iKO</sup> mice. (e) Quantifications of images shown in (d) (n=4 different images analyzed from 2 animals per group). (f) Timeline used to evaluate the effects of long-term deletion of *Cx43* on neurogenesis in the olfactory bulb. (g) Representative confocal image of NeuN<sup>+</sup> newborn neurons (in green) on a coronal section (50  $\mu\text{m}$ ) of the mouse olfactory bulb. The dashed white lines outline the granule cell layer (GCL). (h) Representative images of EdU<sup>+</sup> label retaining cells (LRC, red) and NeuN<sup>+</sup> newborn neurons (green) in GCL of *Cx43*<sup>fl/fl</sup>, *Cx43*EC<sup>iKO</sup> and *Cx43*Glast<sup>iKO</sup> mice. (i) Quantifications of images shown in (h) (n=5-8 sections analyzed from 2 different animals per group). Scale bars are 200  $\mu\text{m}$  in (c), 100  $\mu\text{m}$  in (d) and (g) and 15  $\mu\text{m}$  in (h). Data are mean  $\pm$  SEM. \* $p \leq 0.05$ , \*\*\* $p \leq 0.001$ .

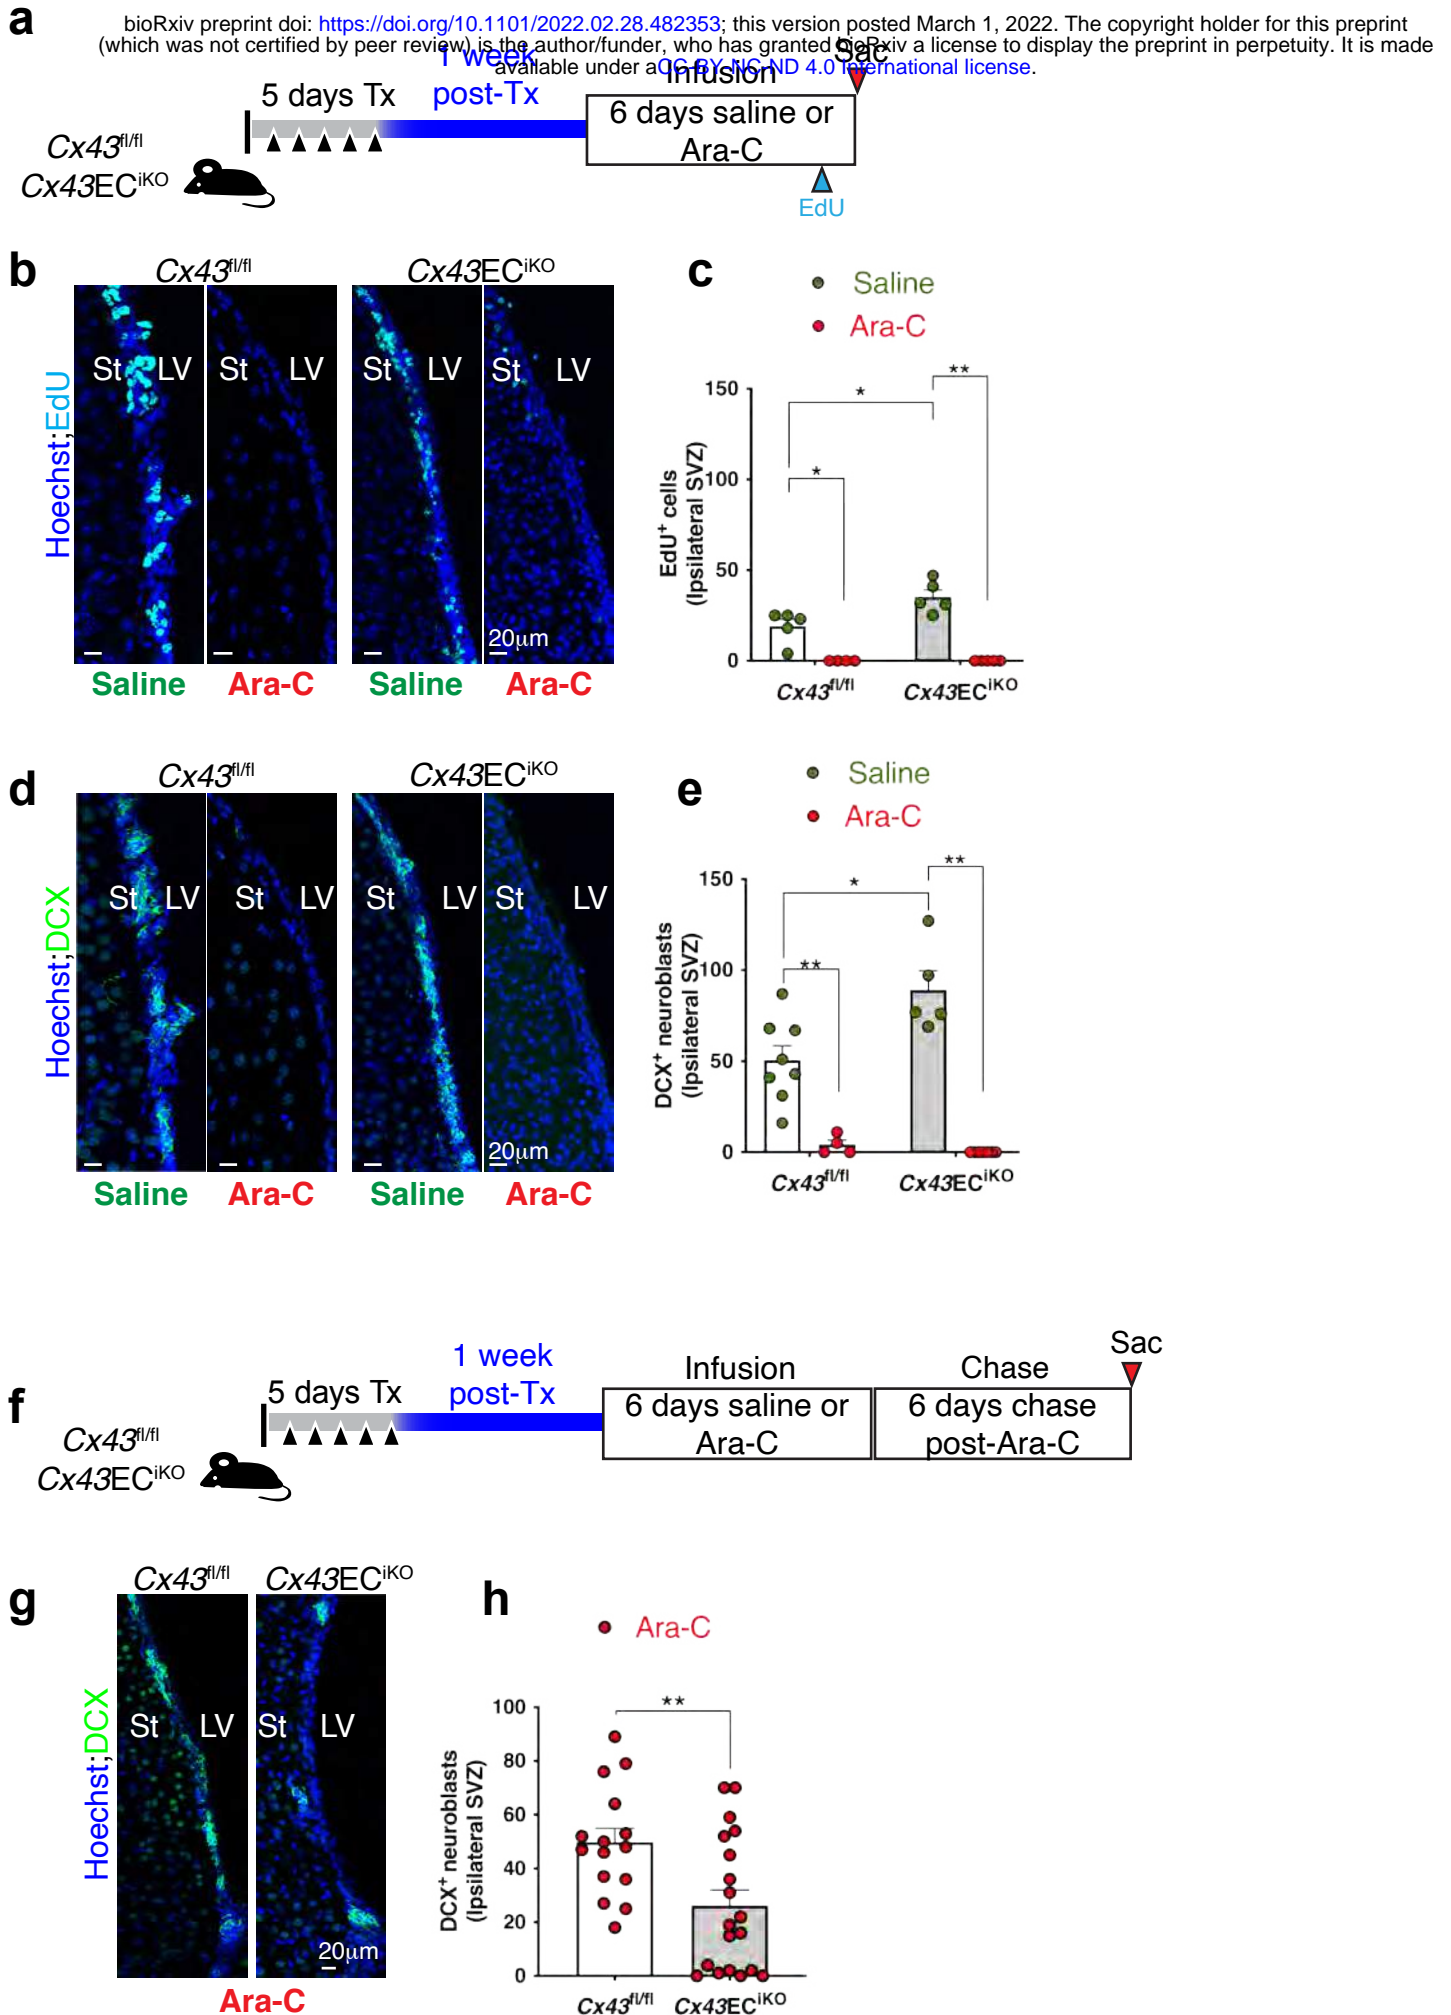



**Figure 5: *EC-expressed Cx43 is necessary for SVZ niche repopulation.***

(a) Timeline used for saline or Ara-C infusions. (b) Representative confocal images showing EdU<sup>+</sup> cells in SVZ of saline vs. Ara-C infused *Cx43<sup>fl/fl</sup>* and *Cx43EC<sup>iKO</sup>* mice after 6 days infusion. (c) Quantifications of images shown in (b) (n=2 different animals). (d) Representative confocal images showing DCX<sup>+</sup> neuroblasts in SVZ of saline vs. Ara-C infused *Cx43<sup>fl/fl</sup>* and *Cx43EC<sup>iKO</sup>* mice. (e) Quantifications of images shown in (d) (n=2 biological replicates). (f) Timeline used for Ara-C infusion and chase period. (g) Representative confocal images showing DCX<sup>+</sup> neuroblasts in SVZ of saline vs. Ara-C infused *Cx43<sup>fl/fl</sup>* and *Cx43EC<sup>iKO</sup>* mice after Ara-C infusion and chase period. (h) Quantifications of images shown in (g) (n=3 biological replicates). Scale bar is 20  $\mu$ m. St: Striatum; LV: Lateral ventricle. Data are mean  $\pm$  SEM. \* $p \leq 0.05$ , \*\* $p \leq 0.01$ .

bioRxiv preprint doi: <https://doi.org/10.1101/2022.02.28.482353>; this version posted March 1, 2022. The copyright holder for this preprint (which was not certified by peer review) is the author/funder, who has granted bioRxiv a license to display the preprint in perpetuity. It is made available under a [CC-BY-NC-ND 4.0 International license](https://creativecommons.org/licenses/by-nc-nd/4.0/).

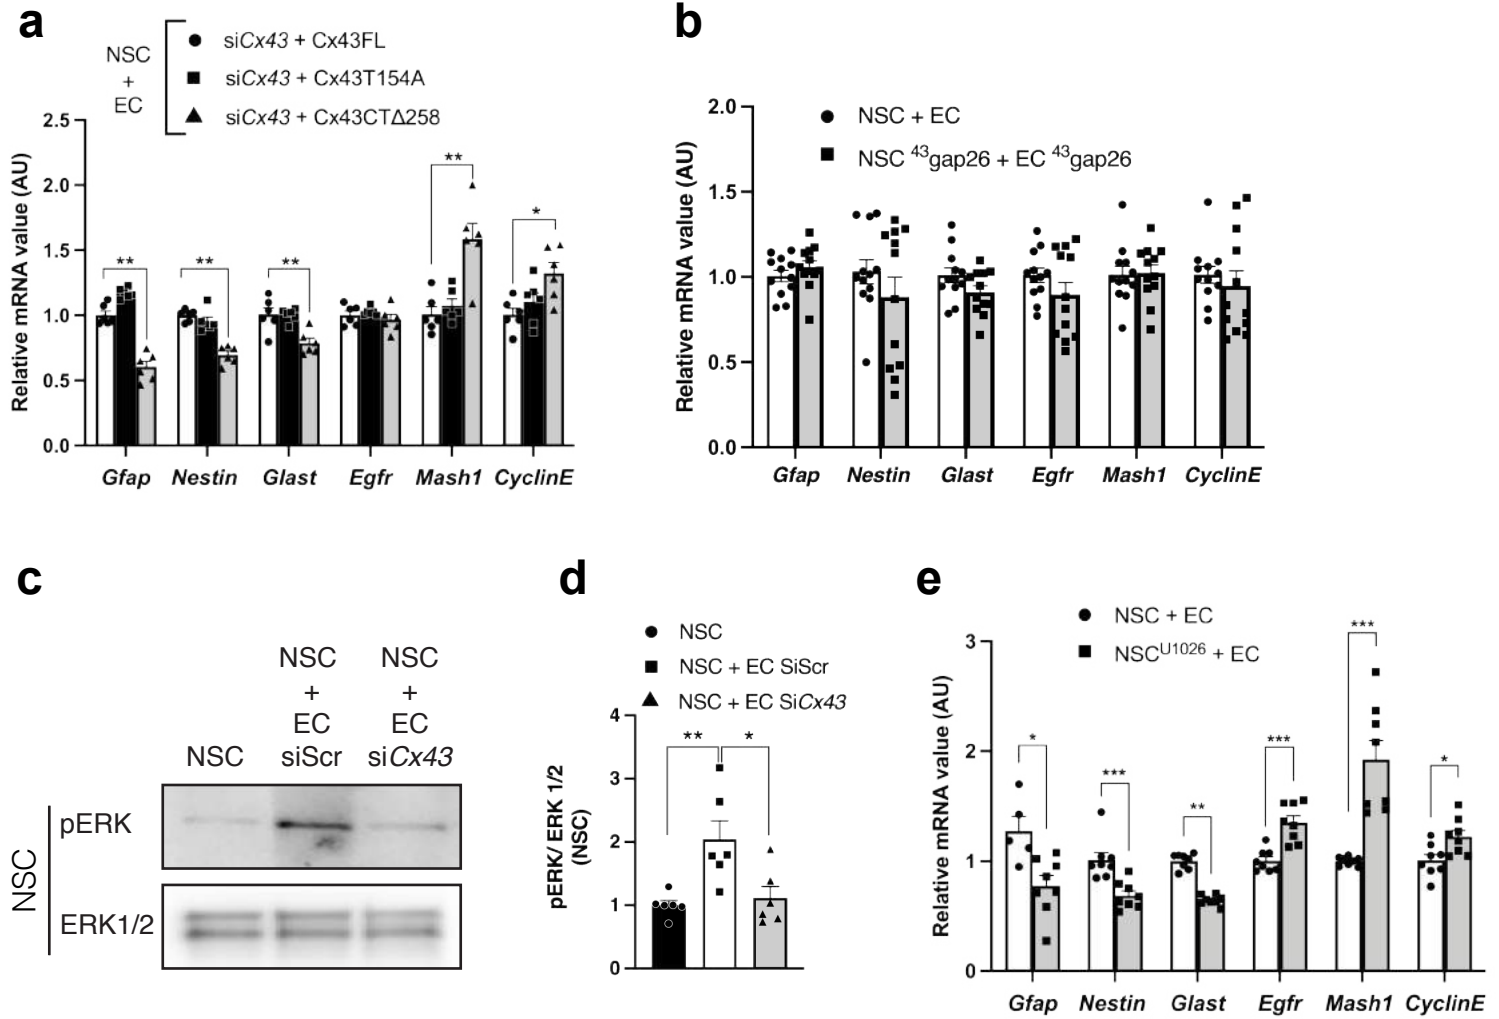

**Figure 6: *Cx43 cytoplasmic tail mediates EC-induced NSC quiescence in an ERK-dependent manner.***

(a) qPCR analysis of quiescent and activated genes in NSCs co-cultured with ECs where both cell types are treated with SiCx43 followed by either the Cx43T154A mutant (Cx43 dead channel) or the Cx43CT $\Delta$ 258 mutant (cytoplasmic tail truncated) compared to NSCs, and ECs co-culture treated with SiCx43 followed by Cx43 full length (FL) construct. (n=3 different experiments). (b) qPCR analysis of quiescent and activated NSCs co-cultured with ECs where both cell types are treated with <sup>43</sup>gap26 compared to NSCs and ECs co-culture (n=3 different experiments). (c) Western blot analysis of pERK and ERK protein levels in NSCs cultured alone, or co-cultured with ECs treated with control siRNA (SiScr) or Cx43 siRNA (SiCx43) and quantifications are shown in (d) (n=6 different experiments). (e) qPCR analysis of quiescent and activated NSCs co-cultured with ECs where NSCs is treated with the ERK signaling inhibitor U0126 compared to NSCs and ECs co-culture (n=2 different experiments). Data are mean  $\pm$  SEM. \* $p \leq 0.05$ , \*\* $p \leq 0.01$ , \*\*\*  $p \leq 0.001$ . \*\*\*\*  $p \leq 0.0001$ .

bioRxiv preprint doi: <https://doi.org/10.1101/2022.02.28.482353>; this version posted March 1, 2022. The copyright holder for this preprint (which was not certified by peer review) is the author/funder, who has granted bioRxiv a license to display the preprint in perpetuity. It is made available under a [CC-BY-NC-ND 4.0 International license](#).

**a**

## In vivo

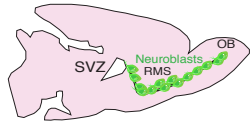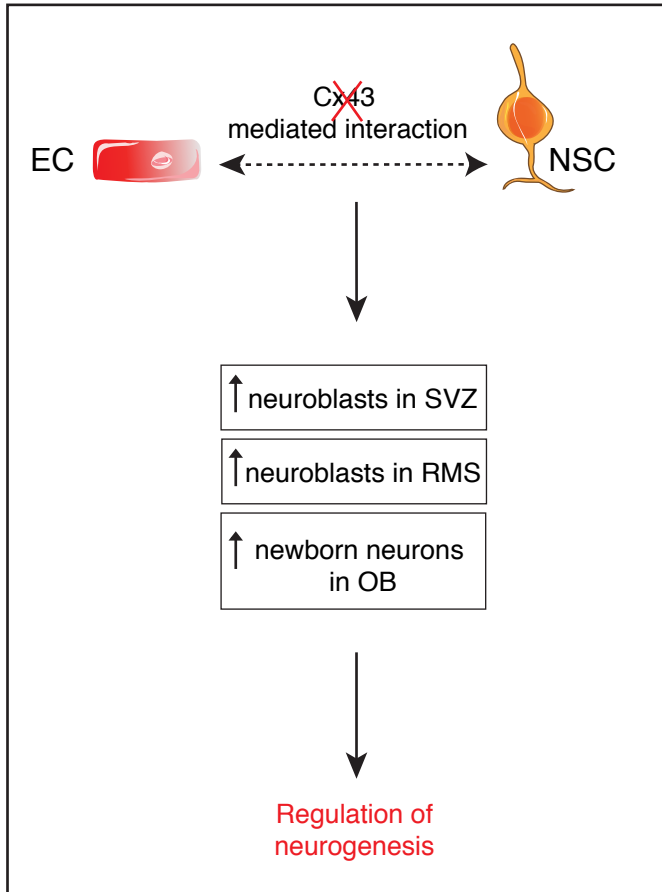

## In vitro

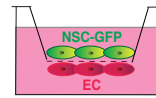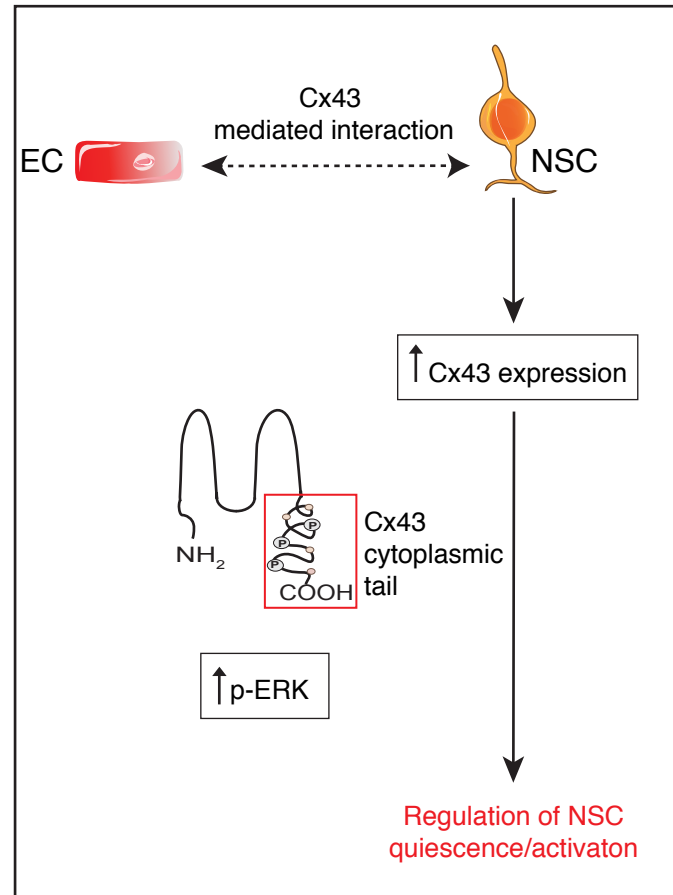

**Figure 7: Schematic representation of Cx43 regulation of NSCs.**

(a) *in vitro*: ECs and NSCs co-culture upregulates Cx43 expression. Cx43-mediated regulation of NSC quiescence and activation is dependent on Cx43 cytoplasmic tail and ERK activation. (b) *in vivo*: absence of Cx43-mediated interaction between ECs and NSCs increases the number of neuroblasts in the SVZ and RMS leading to an increase of newborn neurons in the OB. Absence of vascular Cx43 impairs SVZ neuroblasts re-population post depletion.

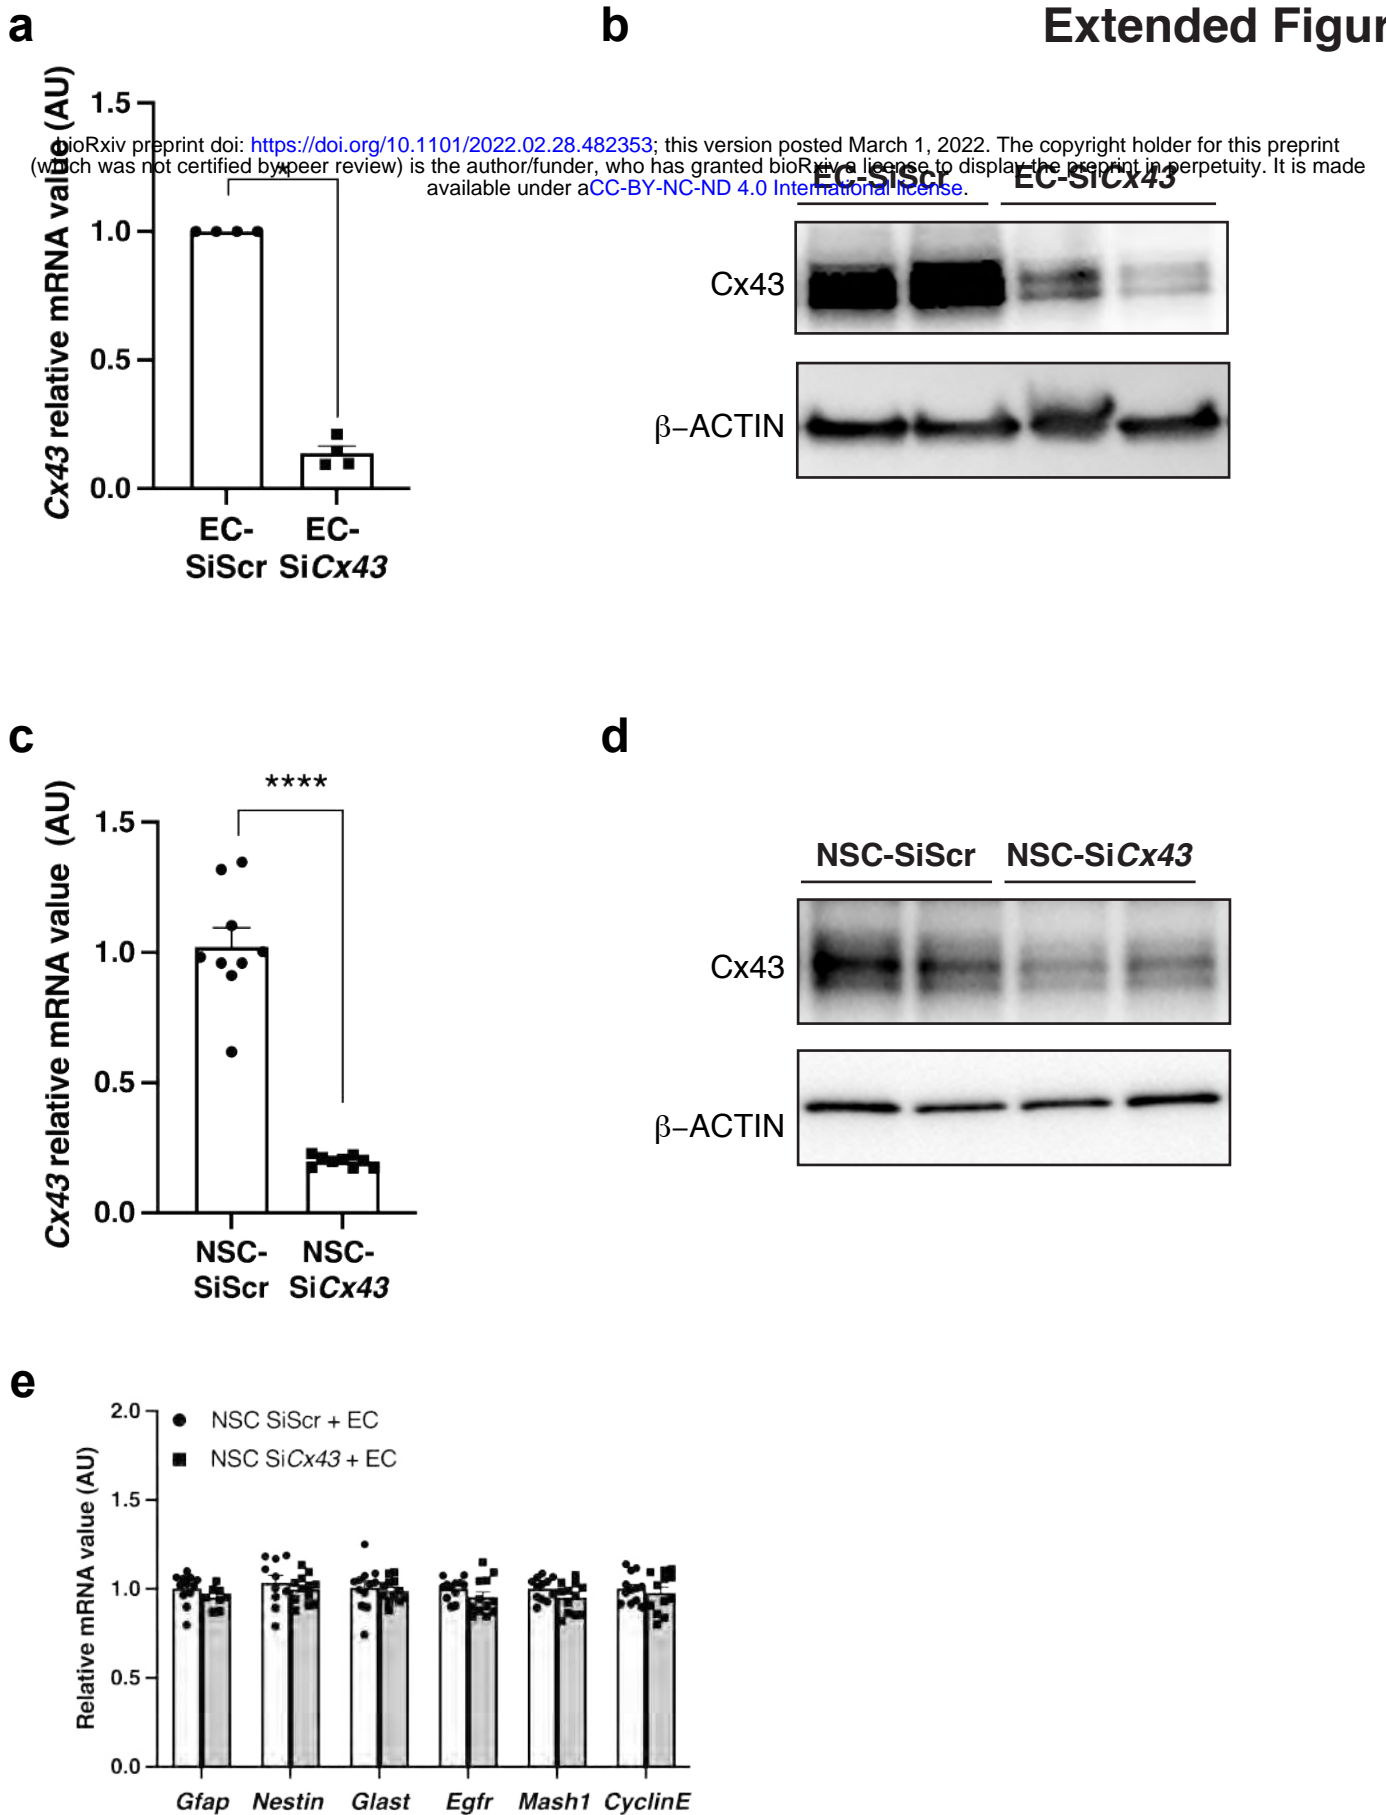

**Extended Figure 1:** (a) qPCR analysis of *Cx43* mRNA level in EC treated with control siRNA (SiScr) or *Cx43* siRNA (si*Cx43*) (n=4 different experiments). (b) Representative western blot of *Cx43* protein expression in EC treated with control siRNA (SiScr) or *Cx43* siRNA (si*Cx43*). (c) qPCR analysis of *Cx43* mRNA level in NSC treated with control siRNA (SiScr) or *Cx43* siRNA (si*Cx43*) (n=8 different experiments). (d) Representative western blot of *Cx43* protein expression in NSC treated with control siRNA (SiScr) or *Cx43* siRNA (si*Cx43*). Data are mean  $\pm$  SEM. \* $p \leq 0.05$ , \*\*\*\* $p \leq 0.0001$ . (e) qPCR analysis of quiescent and activated genes in NSC co-cultured with EC, where NSC are treated with control siRNA (siScr) or *Cx43* siRNA (Si*Cx43*) (n=3 different experiments).

# Extended Figure 2

bioRxiv preprint doi: <https://doi.org/10.1101/2022.02.28.482353>; this version posted March 1, 2022. The copyright holder for this preprint (which was not certified by peer review) is the author/funder, who has granted bioRxiv a license to display the preprint in perpetuity. It is made available under a [CC-BY-NC-ND 4.0 International license](https://creativecommons.org/licenses/by-nc-nd/4.0/).

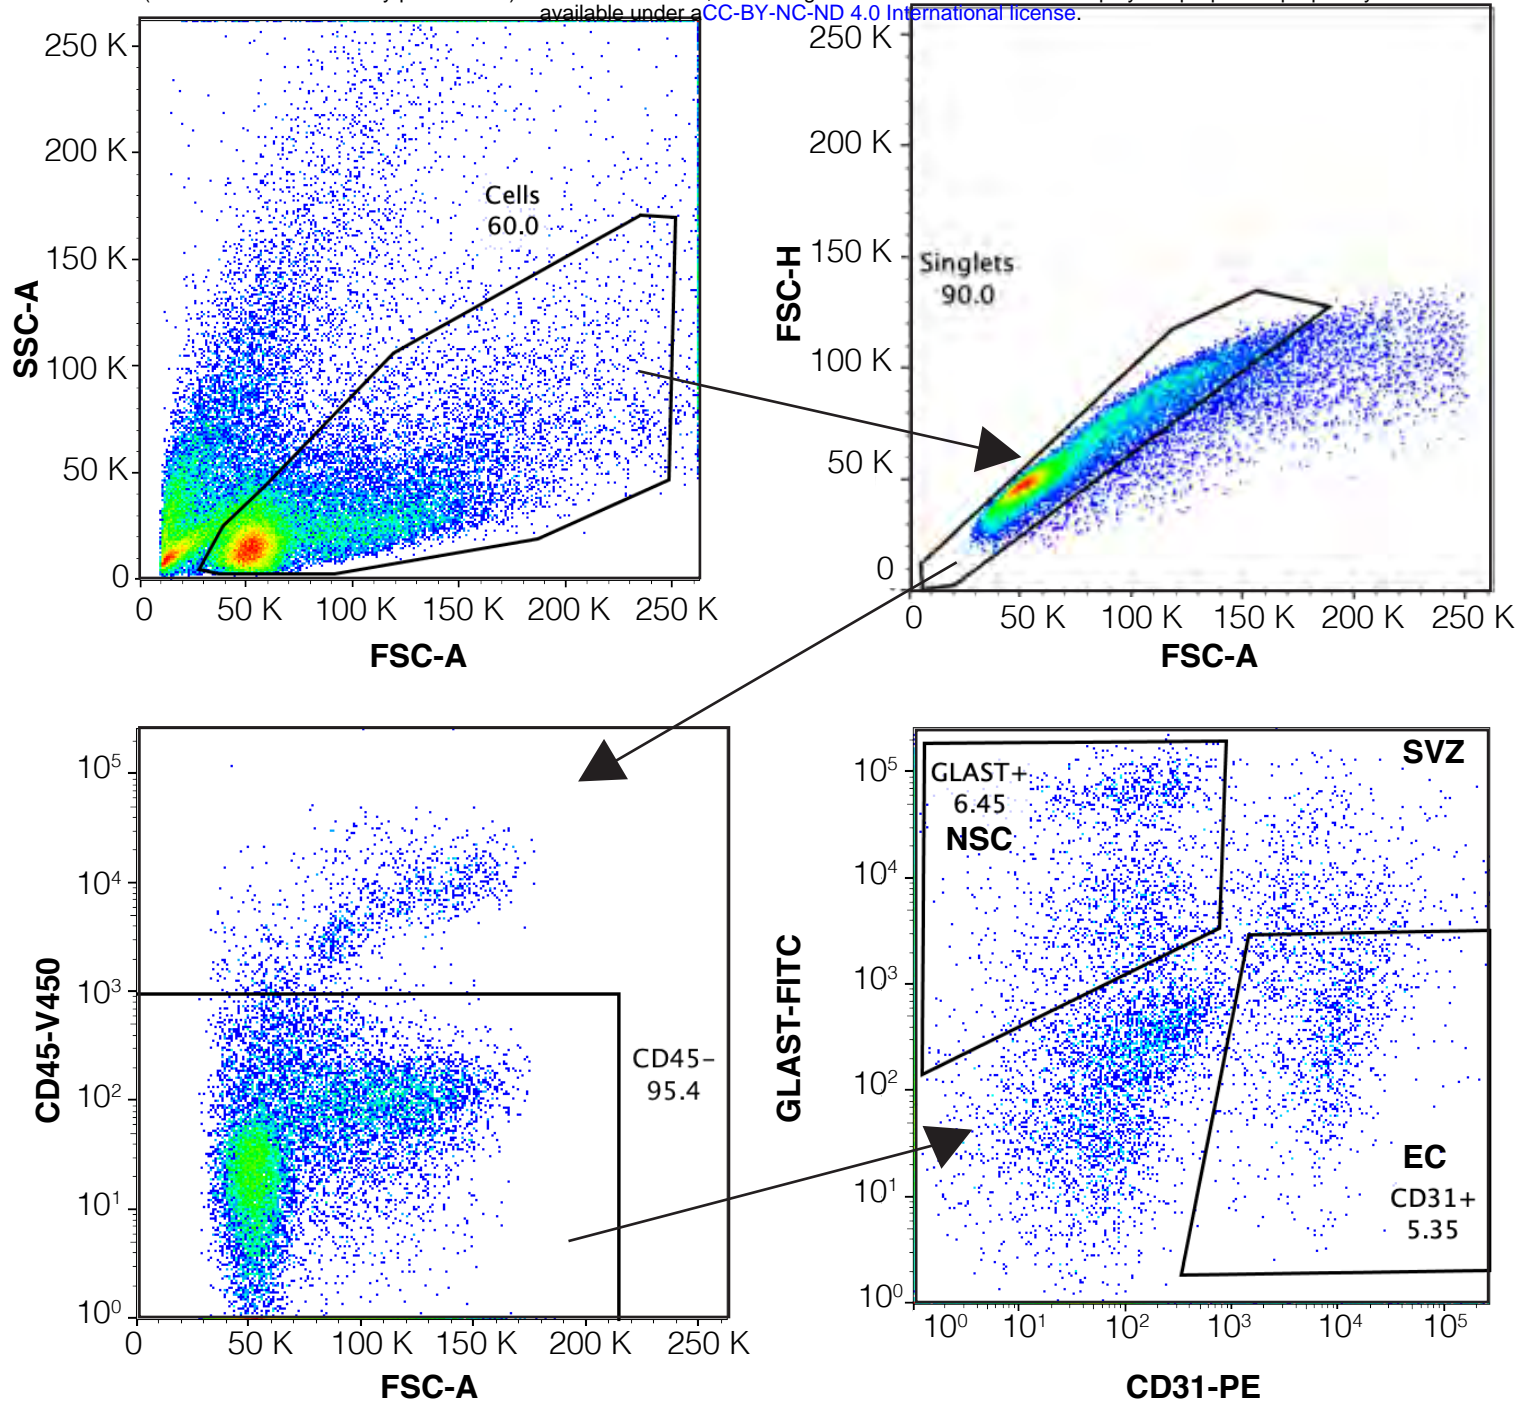



**Extended Figure 2:** Representative FACS plot showing the gating strategy for ECs and NSCs isolation from adult mouse brain SVZ. After excluding debris (top left panel) and doublets (top right panel), CD45<sup>-</sup> cells are selected (bottom left panel) and CD31<sup>+</sup>Glast<sup>+</sup> NSC are collected (bottom right panel). Percentages refer to the population of cells in the previous parent gate. Plots show 100,000 events. SSA: Side-scatter area, FSC: forward-scatter area, FSH: forward-scatter height.

# Extended Figure 3

**a**

bioRxiv preprint doi: <https://doi.org/10.1101/2022.02.28.482353>; this version posted March 1, 2022. The copyright holder for this preprint (which was not certified by peer review) is the author/funder, who has granted bioRxiv a license to display the preprint in perpetuity. It is made available under aCC-BY-NC-ND 4.0 International license.

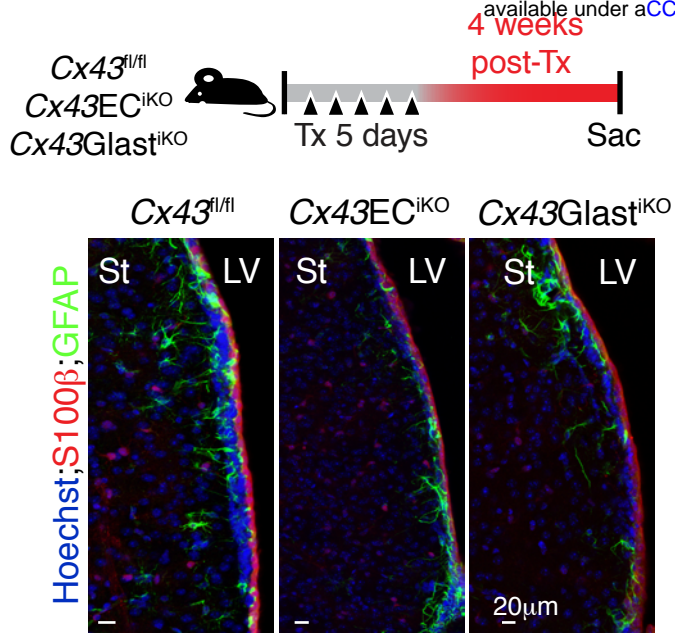

**b**

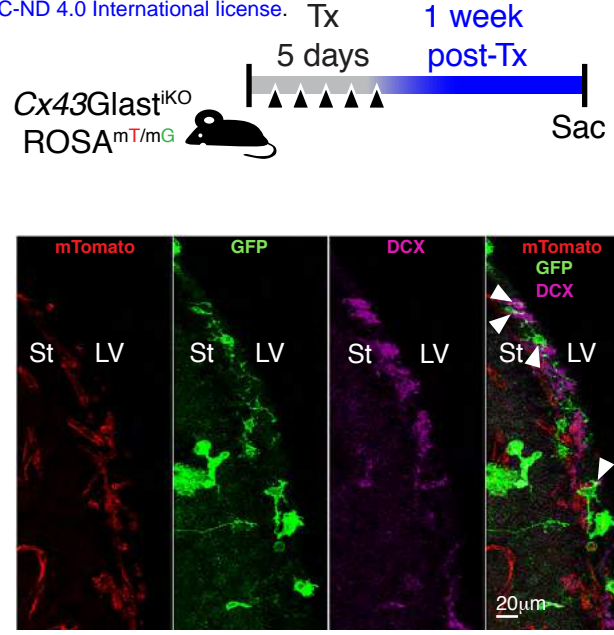

**Extended Figure 3: (a)** Timeline used for label retaining cell (LRC) protocol in *Cx43<sup>fl/fl</sup>*, *Cx43EC<sup>iKO</sup>* and *Cx43Glast<sup>iKO</sup>* mice. **(b)** Representative confocal images of GFAP<sup>+</sup>SOX2<sup>+</sup>LRC in the SVZ of *Cx43<sup>fl/fl</sup>*, *Cx43EC<sup>iKO</sup>* and *Cx43Glast<sup>iKO</sup>* mice. **(c)** Quantification of images shown in **(b)** (n=10 different sections from 2 animals). **(d)** Timeline used for long-term *Cx43* recombination in *Cx43<sup>fl/fl</sup>*, *Cx43EC<sup>iKO</sup>* and *Cx43Glast<sup>iKO</sup>* mice. Bottom panel shows representative confocal images of S100 $\beta$ <sup>+</sup>GFAP<sup>+</sup> cells in the SVZ of *Cx43<sup>fl/fl</sup>*, *Cx43EC<sup>iKO</sup>* and *Cx43Glast<sup>iKO</sup>* mice. **(e)** Timeline used for short-term *Cx43* recombination in *Cx43Glast<sup>iKO</sup>;Rosa<sup>mT/mG</sup>* mice. Bottom panel shows a representative confocal image of a coronal SVZ section showing presence of DCX<sup>+</sup>GFP<sup>+</sup> neuroblasts (white arrowheads) in the population of GFP<sup>+</sup> recombinant cells. St: Striatum; LV: Lateral ventricle. Data are mean  $\pm$  SEM. \*\* $p \leq 0.01$ , \*\*\*\* $p \leq 0.0001$ .

# Extended Figure 4

bioRxiv preprint doi: <https://doi.org/10.1101/2022.02.28.482353>; this version posted March 1, 2022. The copyright holder for this preprint (which was not certified by peer review) is the author/funder, who has granted bioRxiv a license to display the preprint in perpetuity. It is made available under a [CC-BY-NC-ND 4.0 International license](#).

**a**

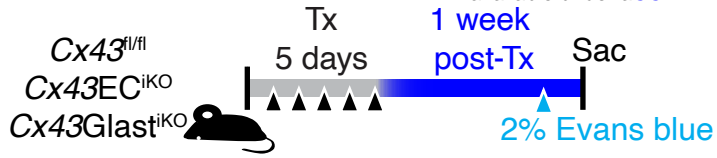

**b**

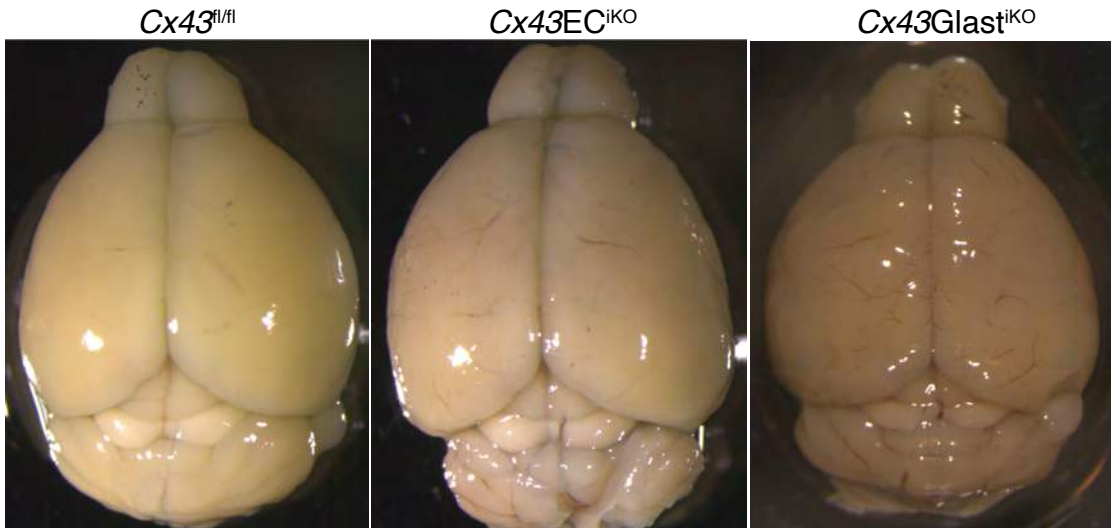

**c**

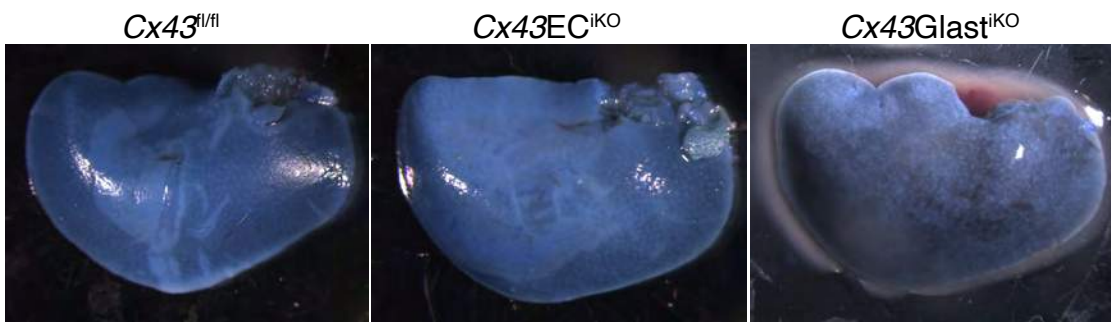

**d**

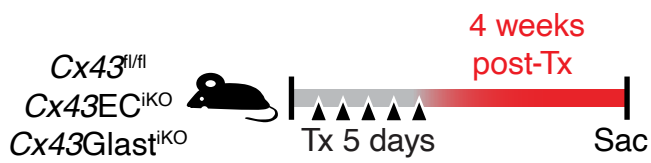

**e**

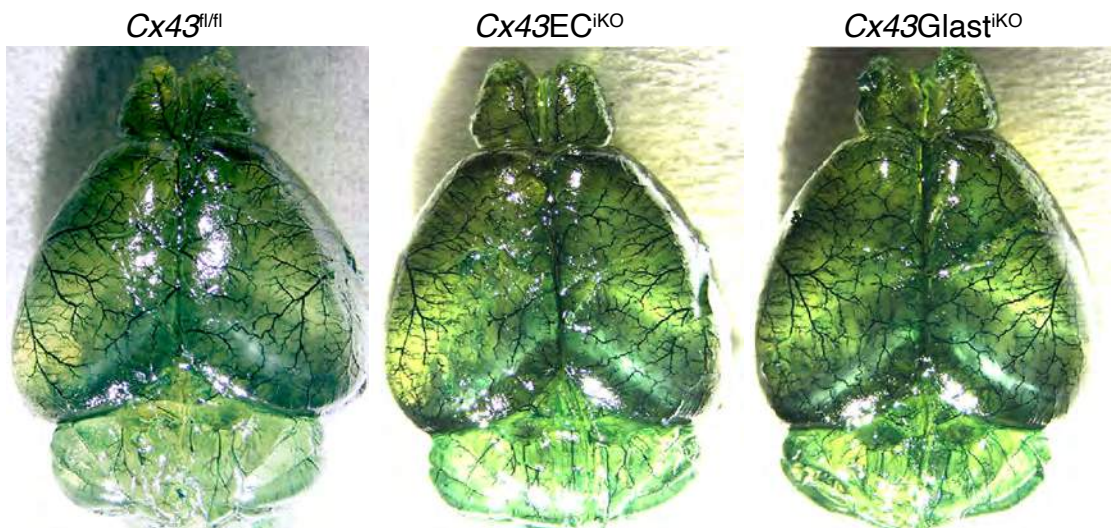

**Extended Figure 4:** (a) Timeline used to evaluate Evans blue permeability in *Cx43<sup>fl/fl</sup>*, *Cx43EC<sup>iKO</sup>* and *Cx43Glast<sup>iKO</sup>* mice. (b) Representative brain images from *Cx43<sup>fl/fl</sup>*, *Cx43EC<sup>iKO</sup>* and *Cx43Glast<sup>iKO</sup>* mice 24h post-2% Evans blue injection, showing absence of dye leakage. (c) Representative liver images from *Cx43<sup>fl/fl</sup>*, *Cx43EC<sup>iKO</sup>* and *Cx43Glast<sup>iKO</sup>* mice 24h post-2% Evans blue injection showing dye uptake. (d) Timeline used to visualize brain microvasculature network organization in *Cx43<sup>fl/fl</sup>*, *Cx43EC<sup>iKO</sup>* and *Cx43Glast<sup>iKO</sup>* mice. (e) Representative clarified brain images showing the microvasculature perfused with vascupaint green from *Cx43<sup>fl/fl</sup>*, *Cx43EC<sup>iKO</sup>* and *Cx43Glast<sup>iKO</sup>*.

# Extended Figure 5

bioRxiv preprint doi: <https://doi.org/10.1101/2022.02.28.482353>; this version posted March 1, 2022. The copyright holder for this preprint (which was not certified by peer review) is the author/funder, who has granted bioRxiv a license to display the preprint in perpetuity. It is made available under a [CC-BY-NC-ND 4.0 International license](https://creativecommons.org/licenses/by-nc-nd/4.0/).

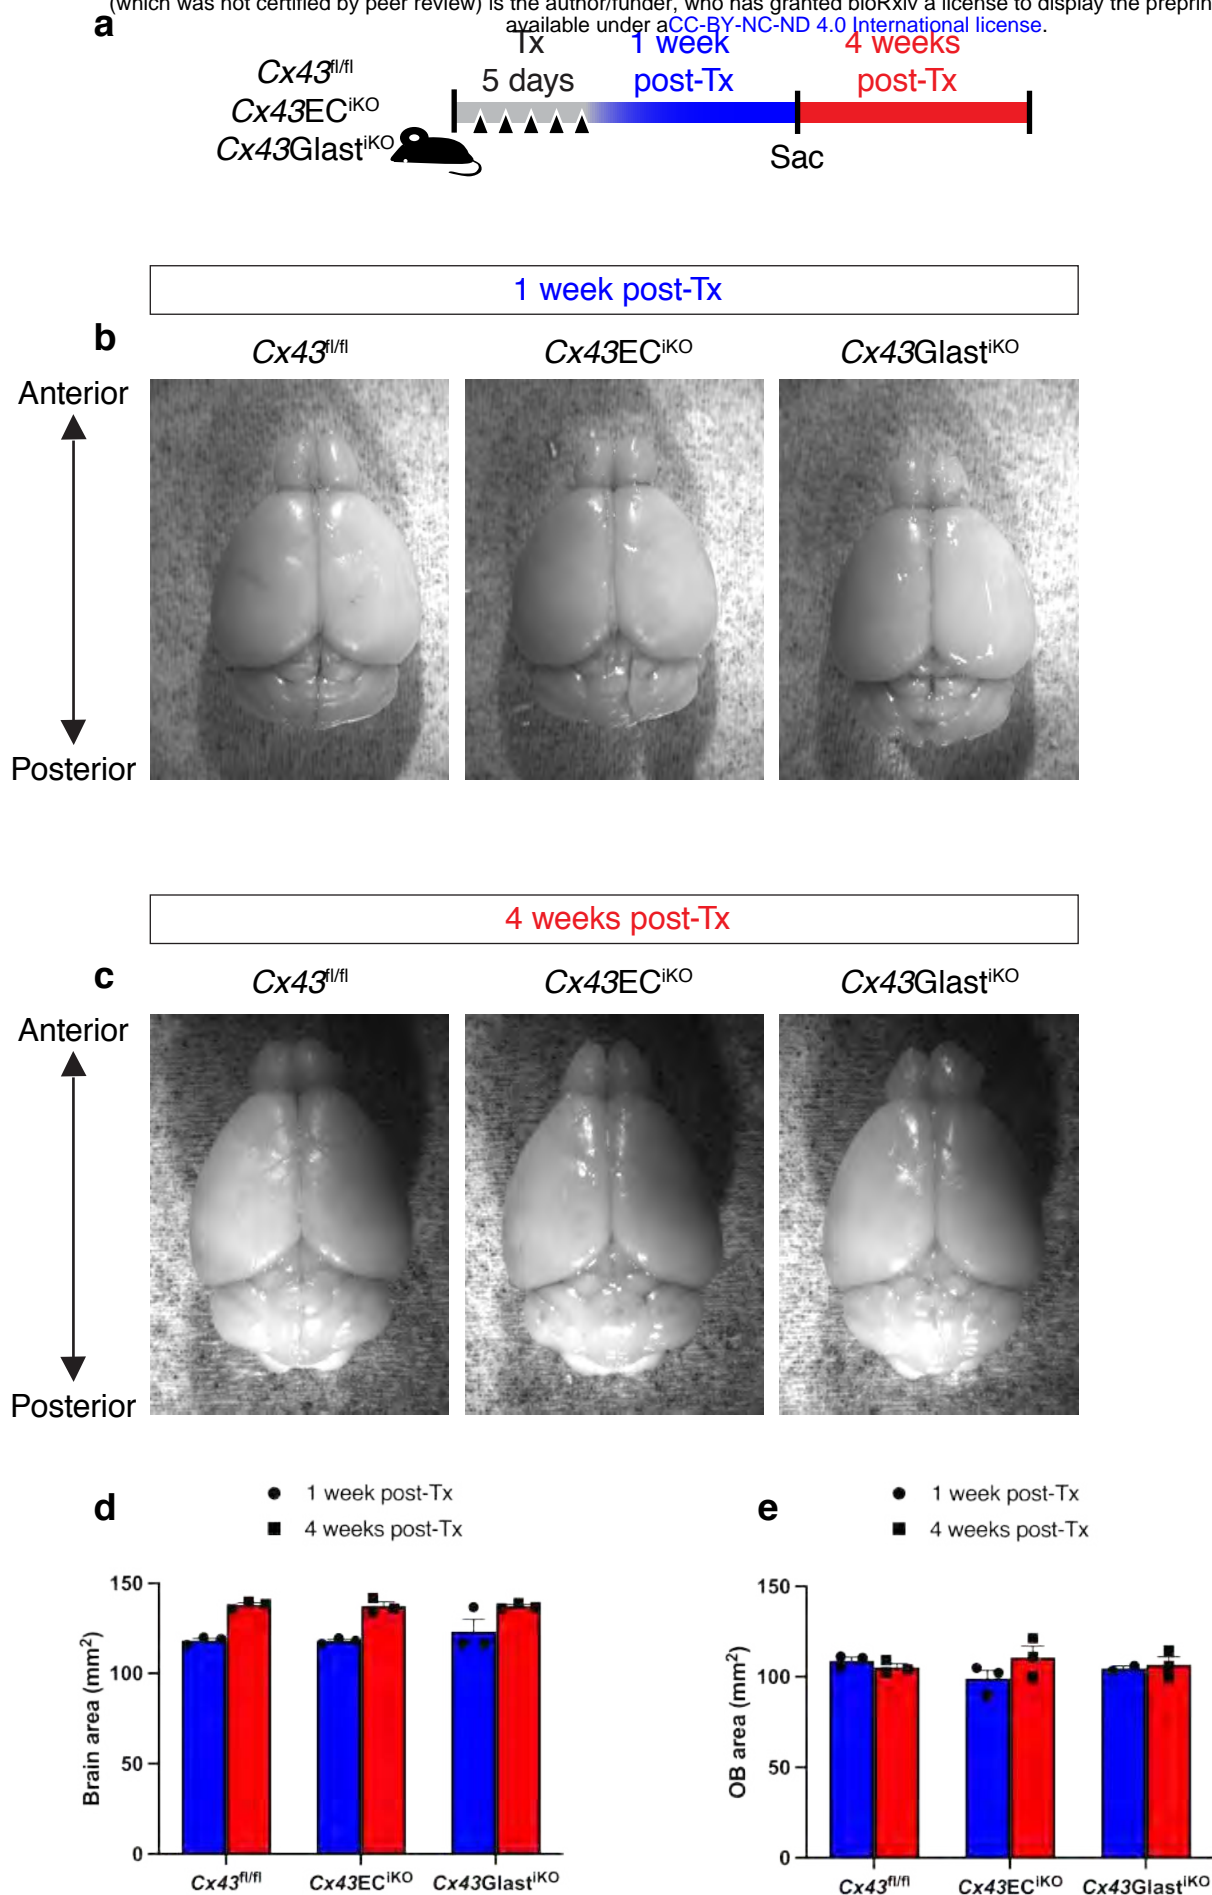

**Extended Figure 5:** (a) Timeline used to evaluate brain and OB areas of *Cx43<sup>fl/fl</sup>*, *Cx43EC<sup>iKO</sup>* and *Cx43Glast<sup>iKO</sup>* mice. (b) and (c) Representative brain images from *Cx43<sup>fl/fl</sup>*, *Cx43EC<sup>iKO</sup>* and *Cx43Glast<sup>iKO</sup>* mice 1-week and 4-weeks post-Tx injections respectively. (d) and (e) Bar graphs showing quantifications of brain and OB areas of *Cx43<sup>fl/fl</sup>*, *Cx43EC<sup>iKO</sup>* and *Cx43Glast<sup>iKO</sup>* mice respectively at 1-week and 4-weeks post-Tx injections.

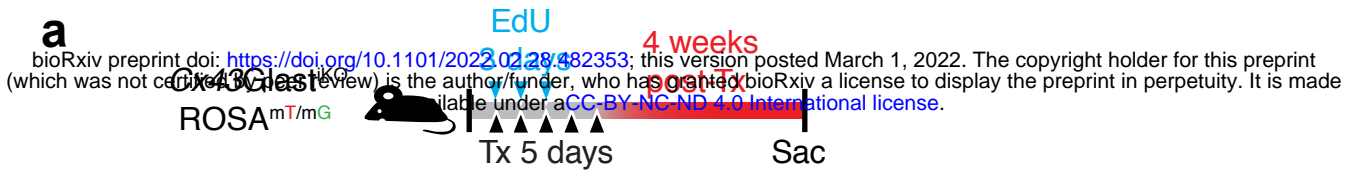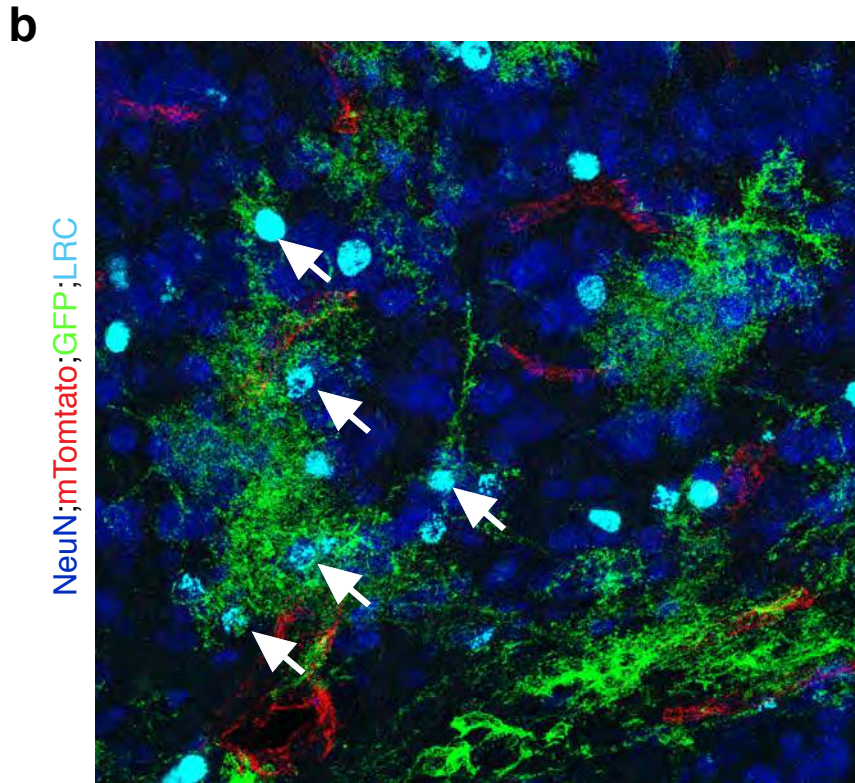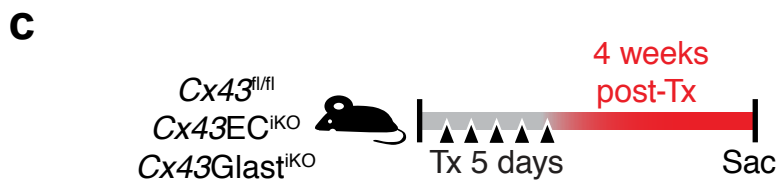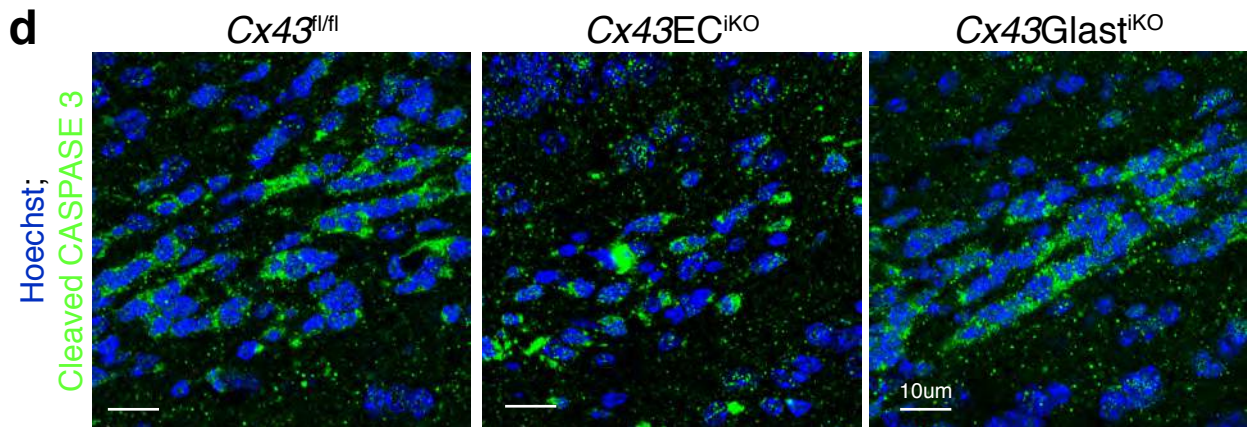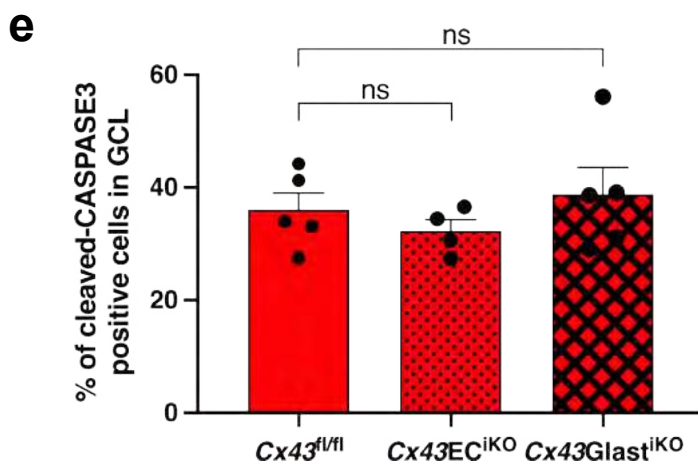



**Extended Figure 6:** (a) Timeline used for *Cx43* recombination in *Cx43Glast<sup>iKO</sup>;Rosa<sup>mT/mG</sup>* mice. (b) Representative confocal image of NeuN<sup>+</sup>LRC in the granule cell layer of the olfactory bulb of *Cx43Glast<sup>iKO</sup>;Rosa<sup>mT/mG</sup>* mice. Note that NeuN<sup>+</sup>LRC are GFP<sup>+</sup> (white arrows). (c) Timeline used for long-term *Cx43* recombination in *Cx43<sup>fl/fl</sup>*, *Cx43EC<sup>iKO</sup>* and *Cx43Glast<sup>iKO</sup>* mice. (d) Representative images of cleaved CASPASE-3<sup>+</sup> cells in the granule cell layer of the olfactory bulb of *Cx43<sup>fl/fl</sup>*, *Cx43EC<sup>iKO</sup>* and *Cx43Glast<sup>iKO</sup>* mice. (e) Quantifications of images shown in (d) (n=4 different images analyzed from 1 animal per group). Data are mean  $\pm$  SEM. ns >  $\leq$  0.05.

# Extended Figure 7

**a**  
bioRxiv preprint doi: <https://doi.org/10.1101/2022.02.28.482353>; this version posted March 1, 2022. The copyright holder for this preprint (which was not certified by peer review) is the author/funder, who has granted bioRxiv a license to display the preprint in perpetuity. It is made available under aCC-BY-NC-ND 4.0 International license.

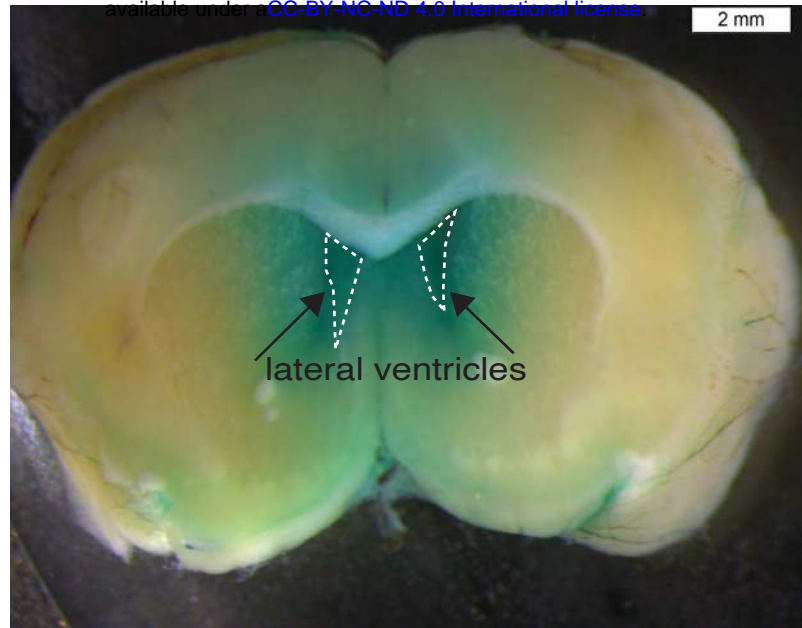

**Extended Figure 7:** Image of brain sagittal section of a mouse injected with fast green dye in the ipsi-lateral ventricle at the optimized coordinates (x:1.4, y:0.5, z:2.5) used to infuse AraC. Note that both lateral ventricles (enclosed in dashed lines) are green colored after dye infusion, demonstrating that the coordinates used target the SVZ.

**a**

bioRxiv preprint doi: <https://doi.org/10.1101/2022.02.28.482353>; this version posted March 2, 2022. The copyright holder for this preprint (which was not certified by peer review) is the author/funder, who has granted bioRxiv a license to display the preprint in perpetuity. It is made available under aCC-BY-NC-ND 4.0 International license.

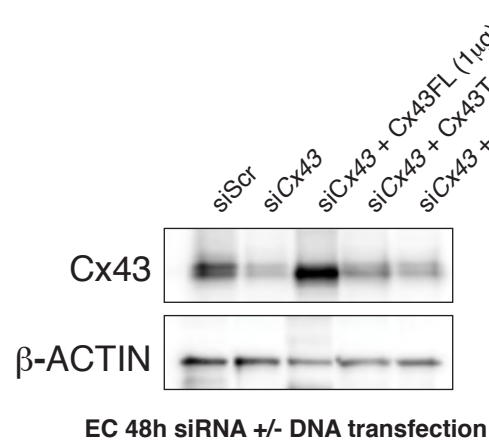

**b**

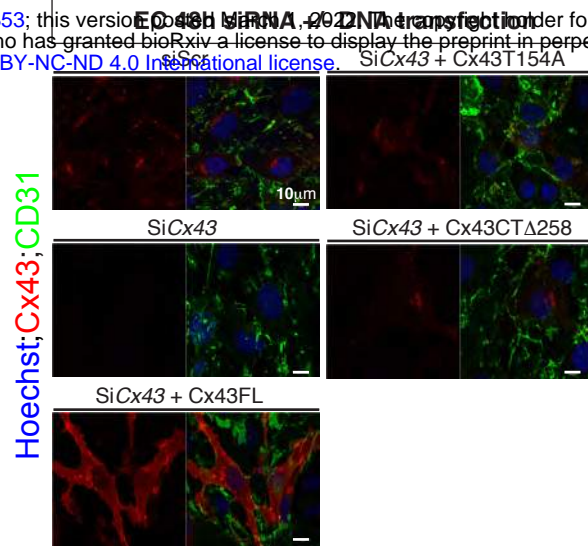

**c**

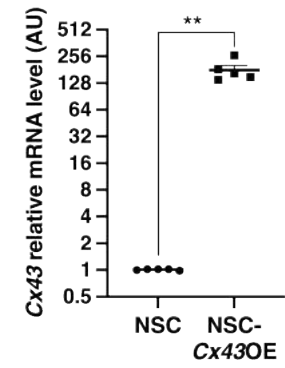

**d**

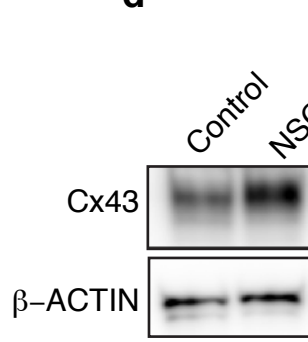

**e**

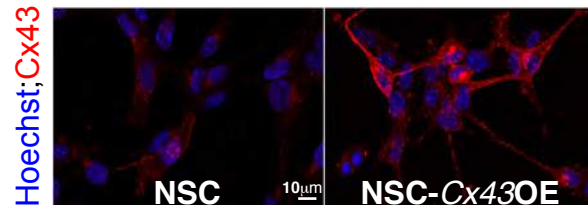

**f**

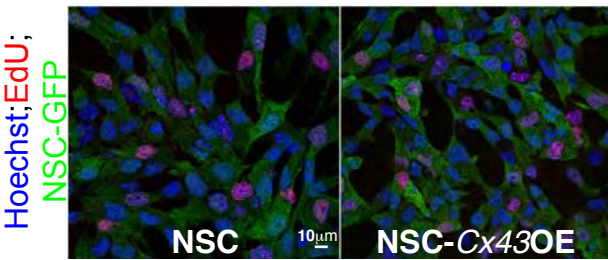

**g**

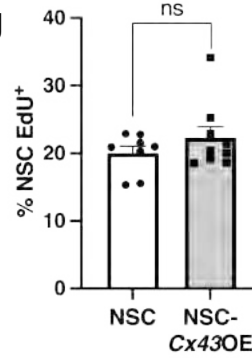

**Extended Figure 8:** (a) Representative western blot of Cx43 protein expression in ECs treated with control siRNA (SiScr), *Cx43* siRNA (si*Cx43*), Si*Cx43* followed by *Cx43* full length construct (FL), Si*Cx43* followed by *Cx43*T154A or Si*Cx43* followed by *Cx43*CT $\Delta$ 258. (b) qPCR analysis of *Cx43* mRNA level in NSC and NSC overexpressing *Cx43* (NSC-*Cx43*OE) (n=5 different experiments). (c) Representative western blot of *Cx43* protein expression in NSC and NSC-*Cx43*OE. (d) Representative confocal images of NSC and NSC-*Cx43*OE immuno-stained for *Cx43*. (e) Representative confocal images of NSC-GFP and NSC-GFP-*Cx43*OE 24h after EdU incorporation. (f) Quantification of images shown in (d) (n=4 different experiments). Data are mean  $\pm$  SEM. ns > 0.05, \*\* $p \leq$  0.01.
